# Supplementary material
Source: publisher figshare collection journal article supplement (https://plos.figshare.com/articles/dataset/_/1630704)
Supplement: Supplementary file 1 [file 1]

Archive with 3 entries (3 files):
- S1_File.pdf
- S2_File.pdf
- S3_File.pdf
