# Supplementary material
Source: publisher figshare collection journal article supplement (https://plos.figshare.com/articles/dataset/_/1630704)
Supplement: Supplementary file 1 [file 1 › S1_File.pdf]

S1 Figure A. Cell Lineages at pH 6.0

2013-August-28 Cell 'A' Lineage  
pH 6.0

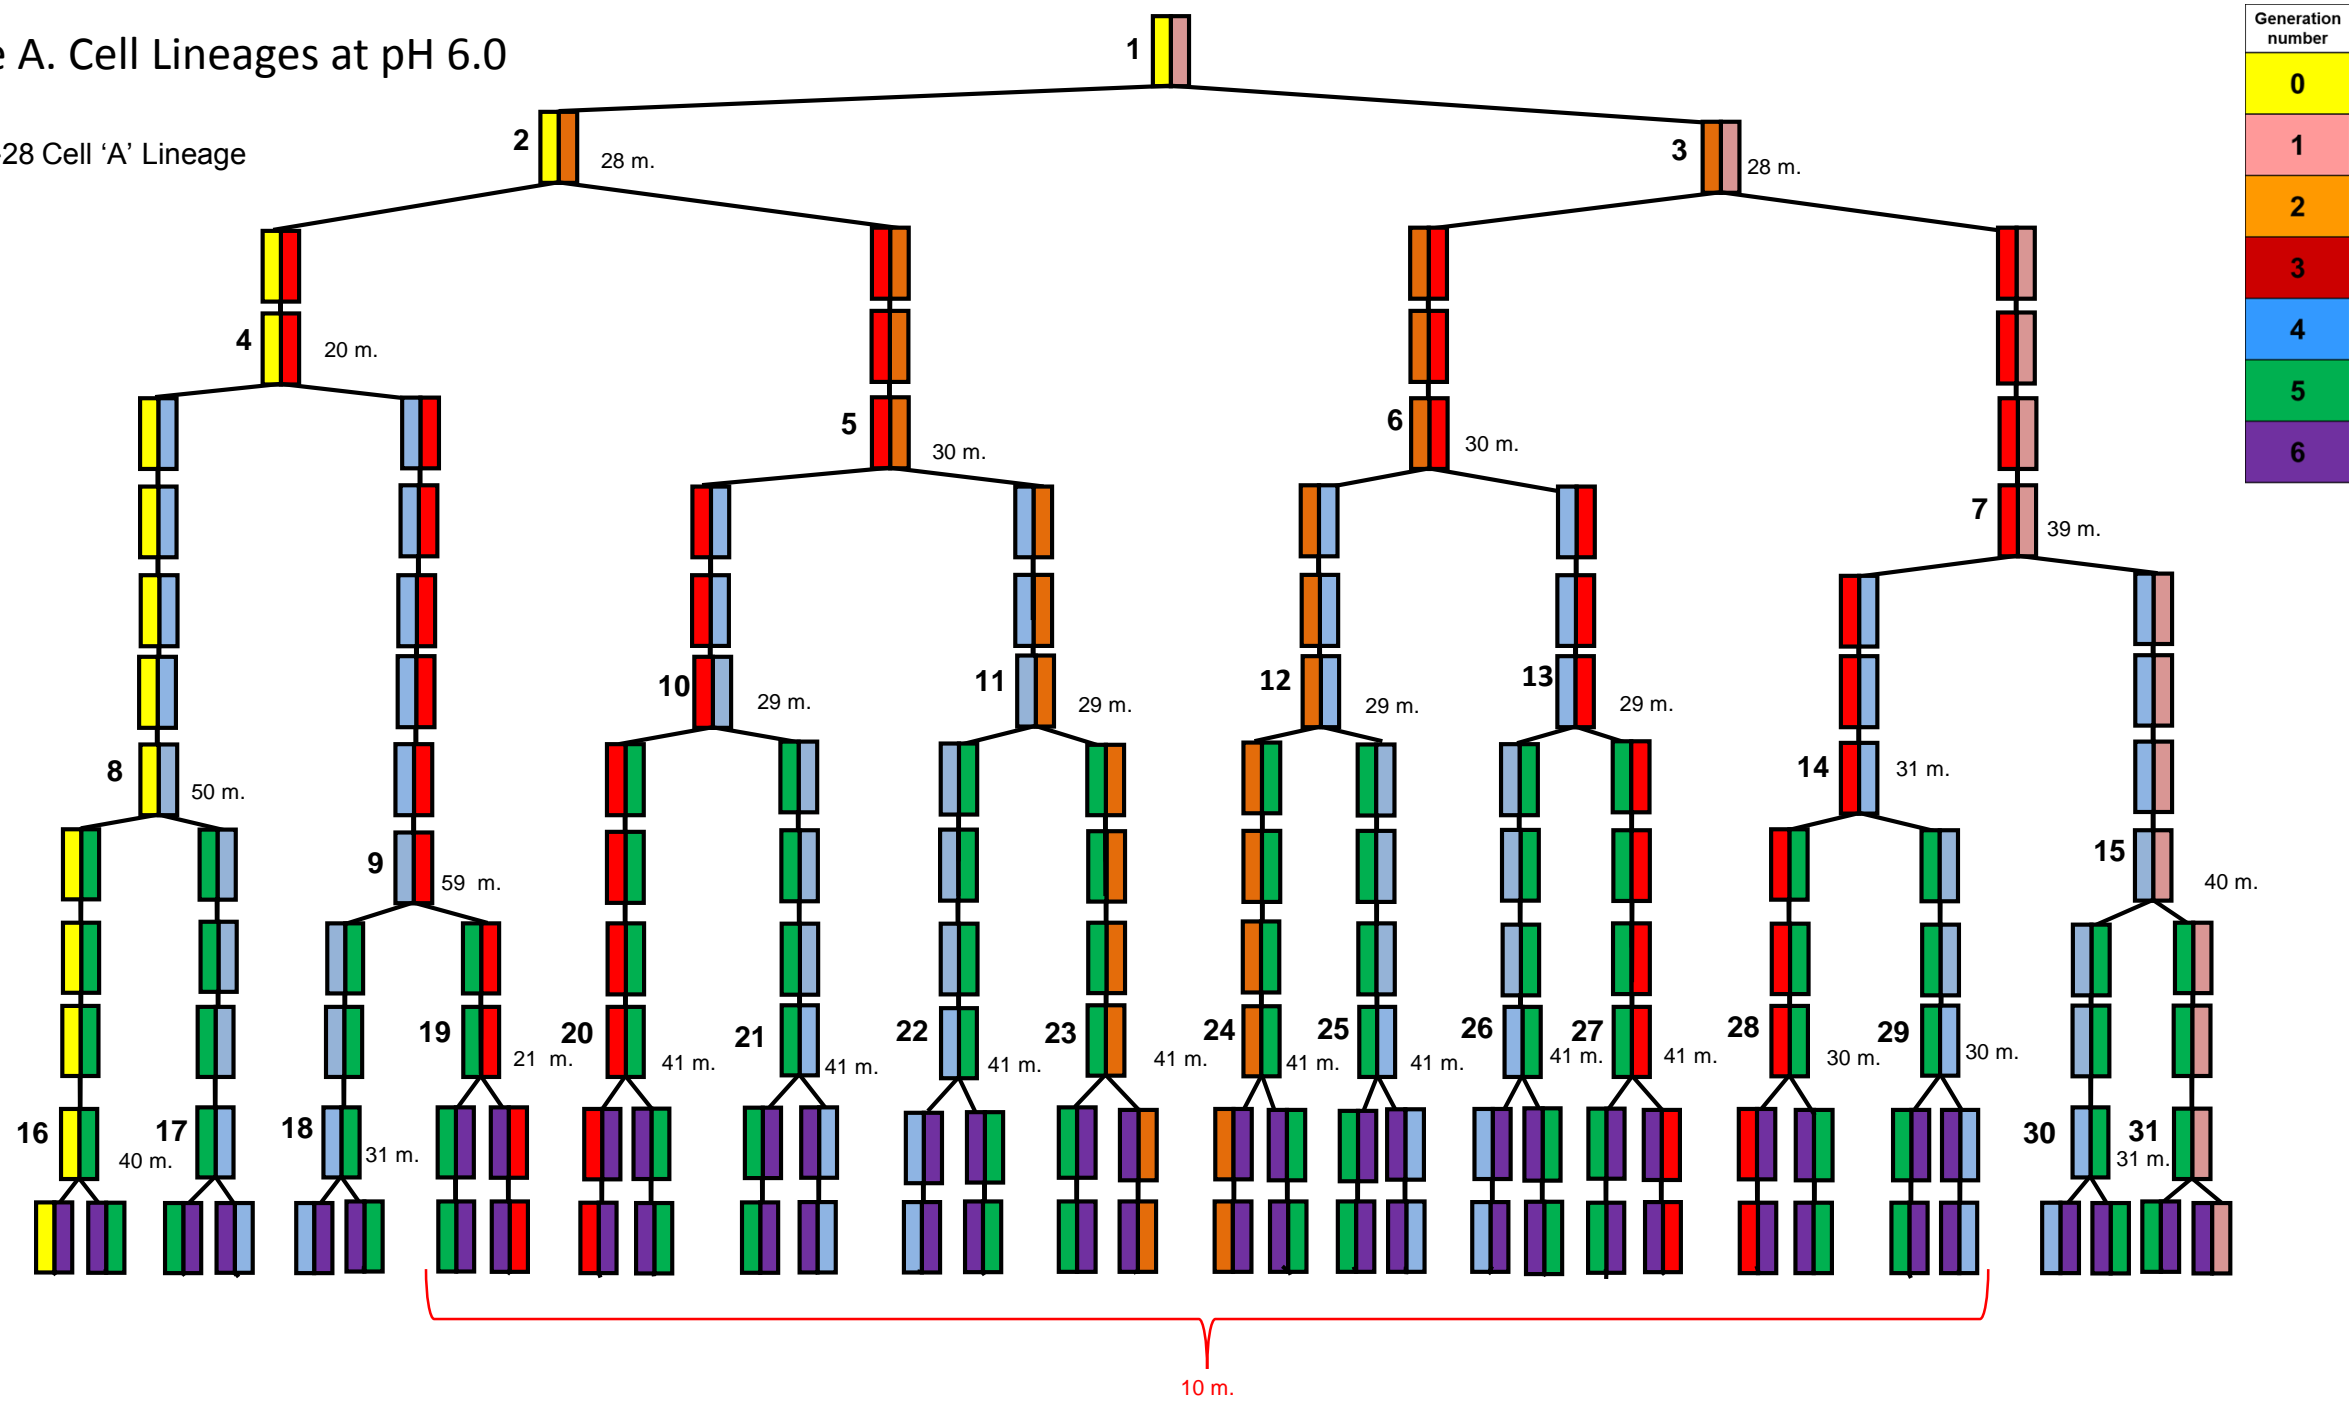

pH 6.0

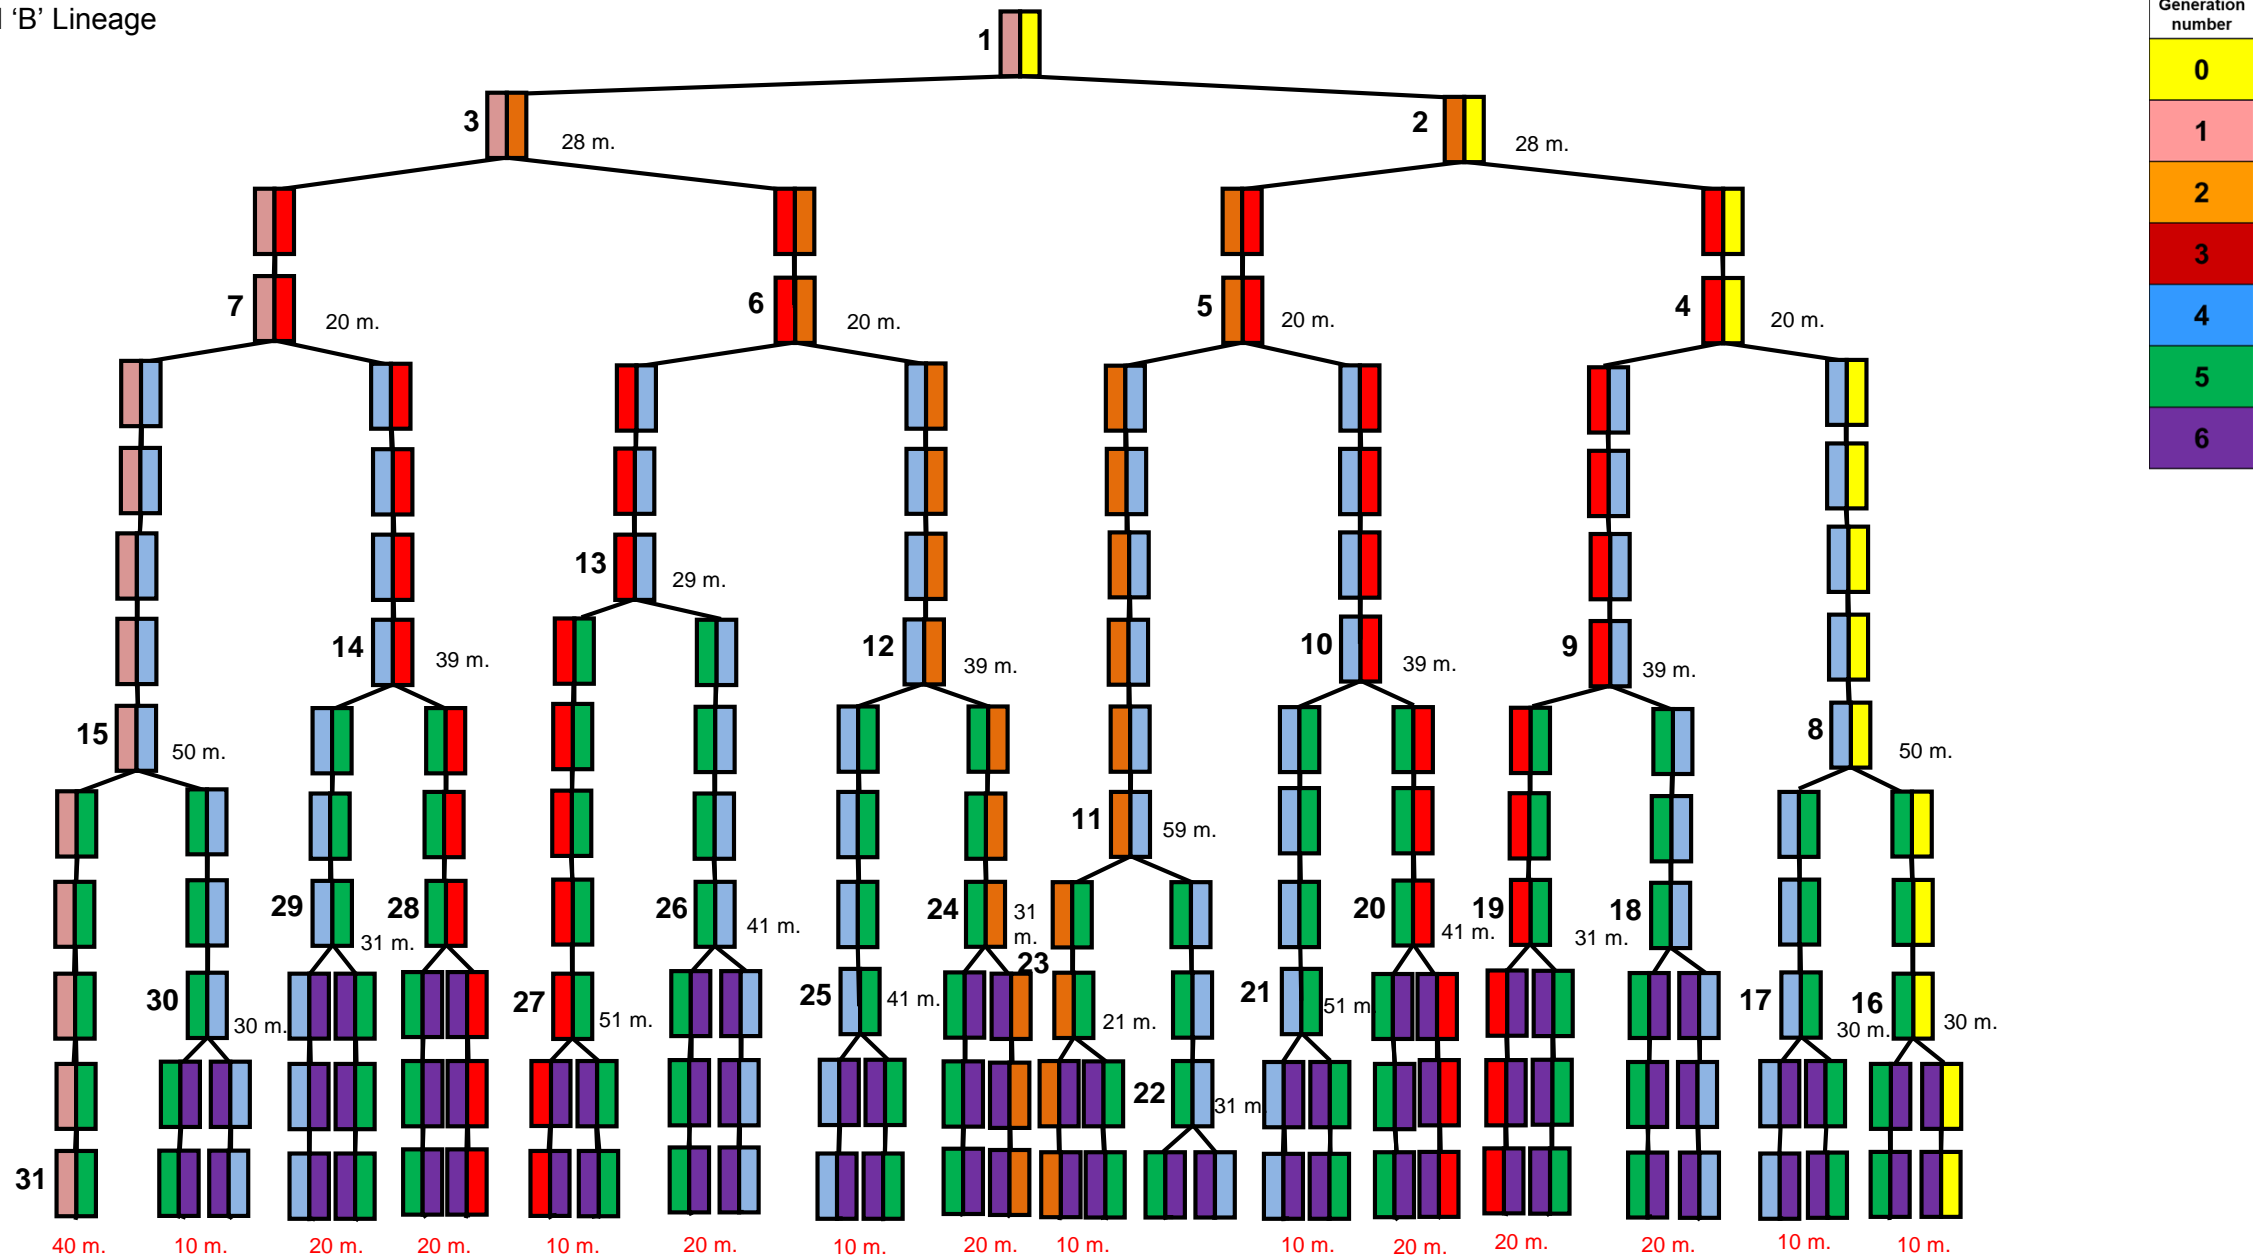

2013-Oct-11 Left Group Cell 'A' Lineage

**pH 6.0**

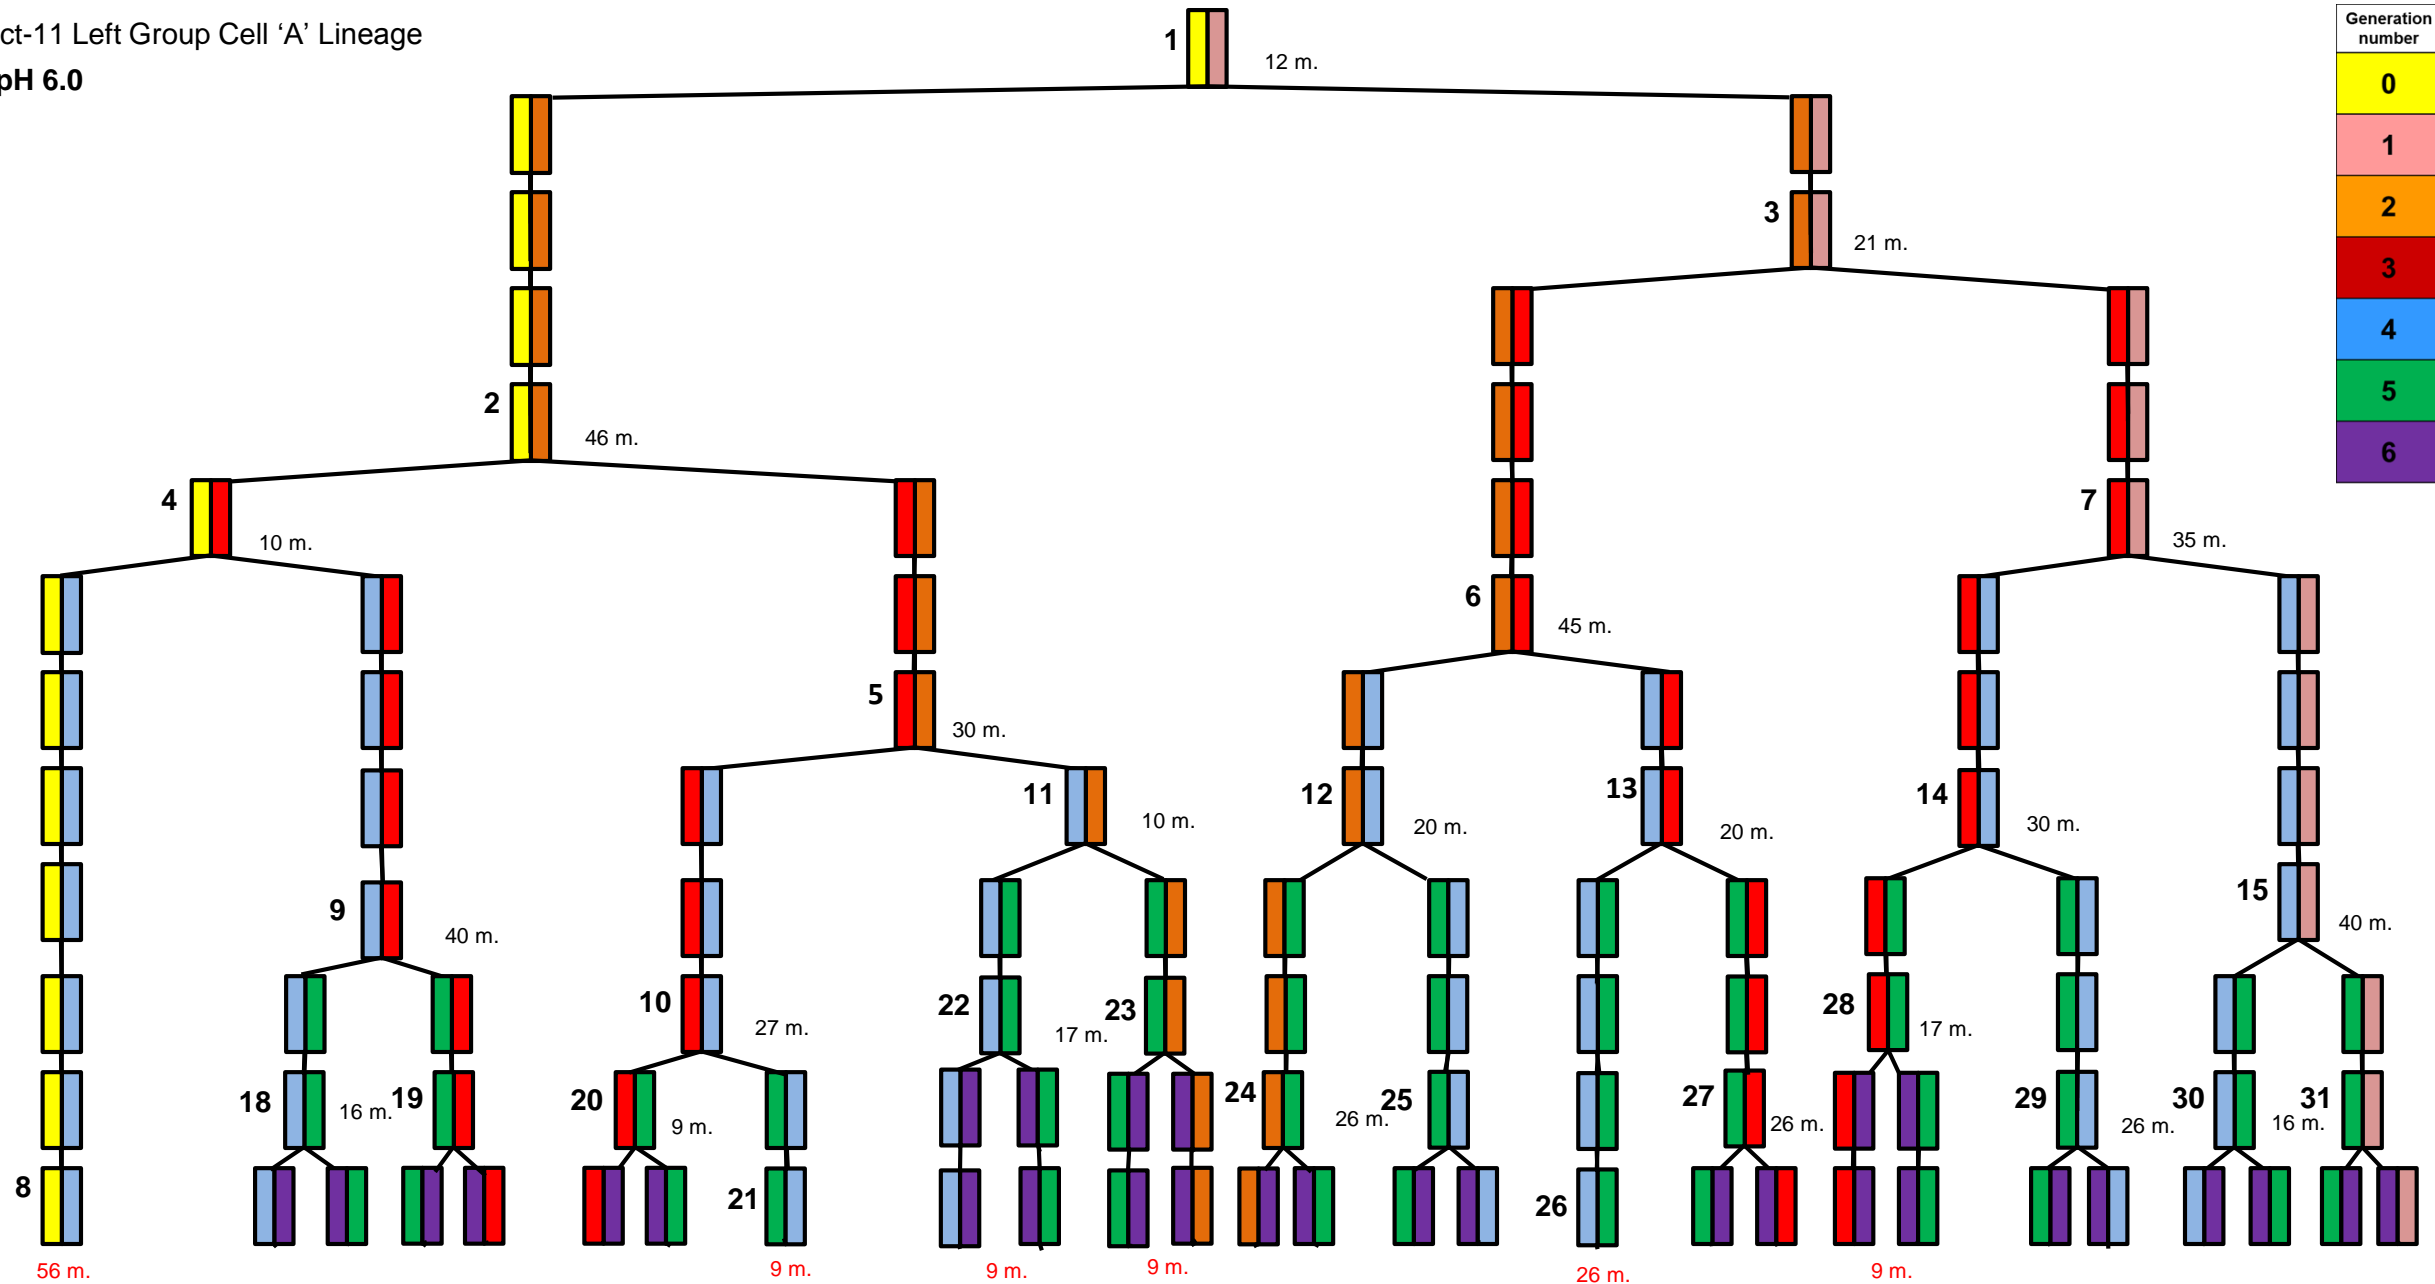

pH 6.0

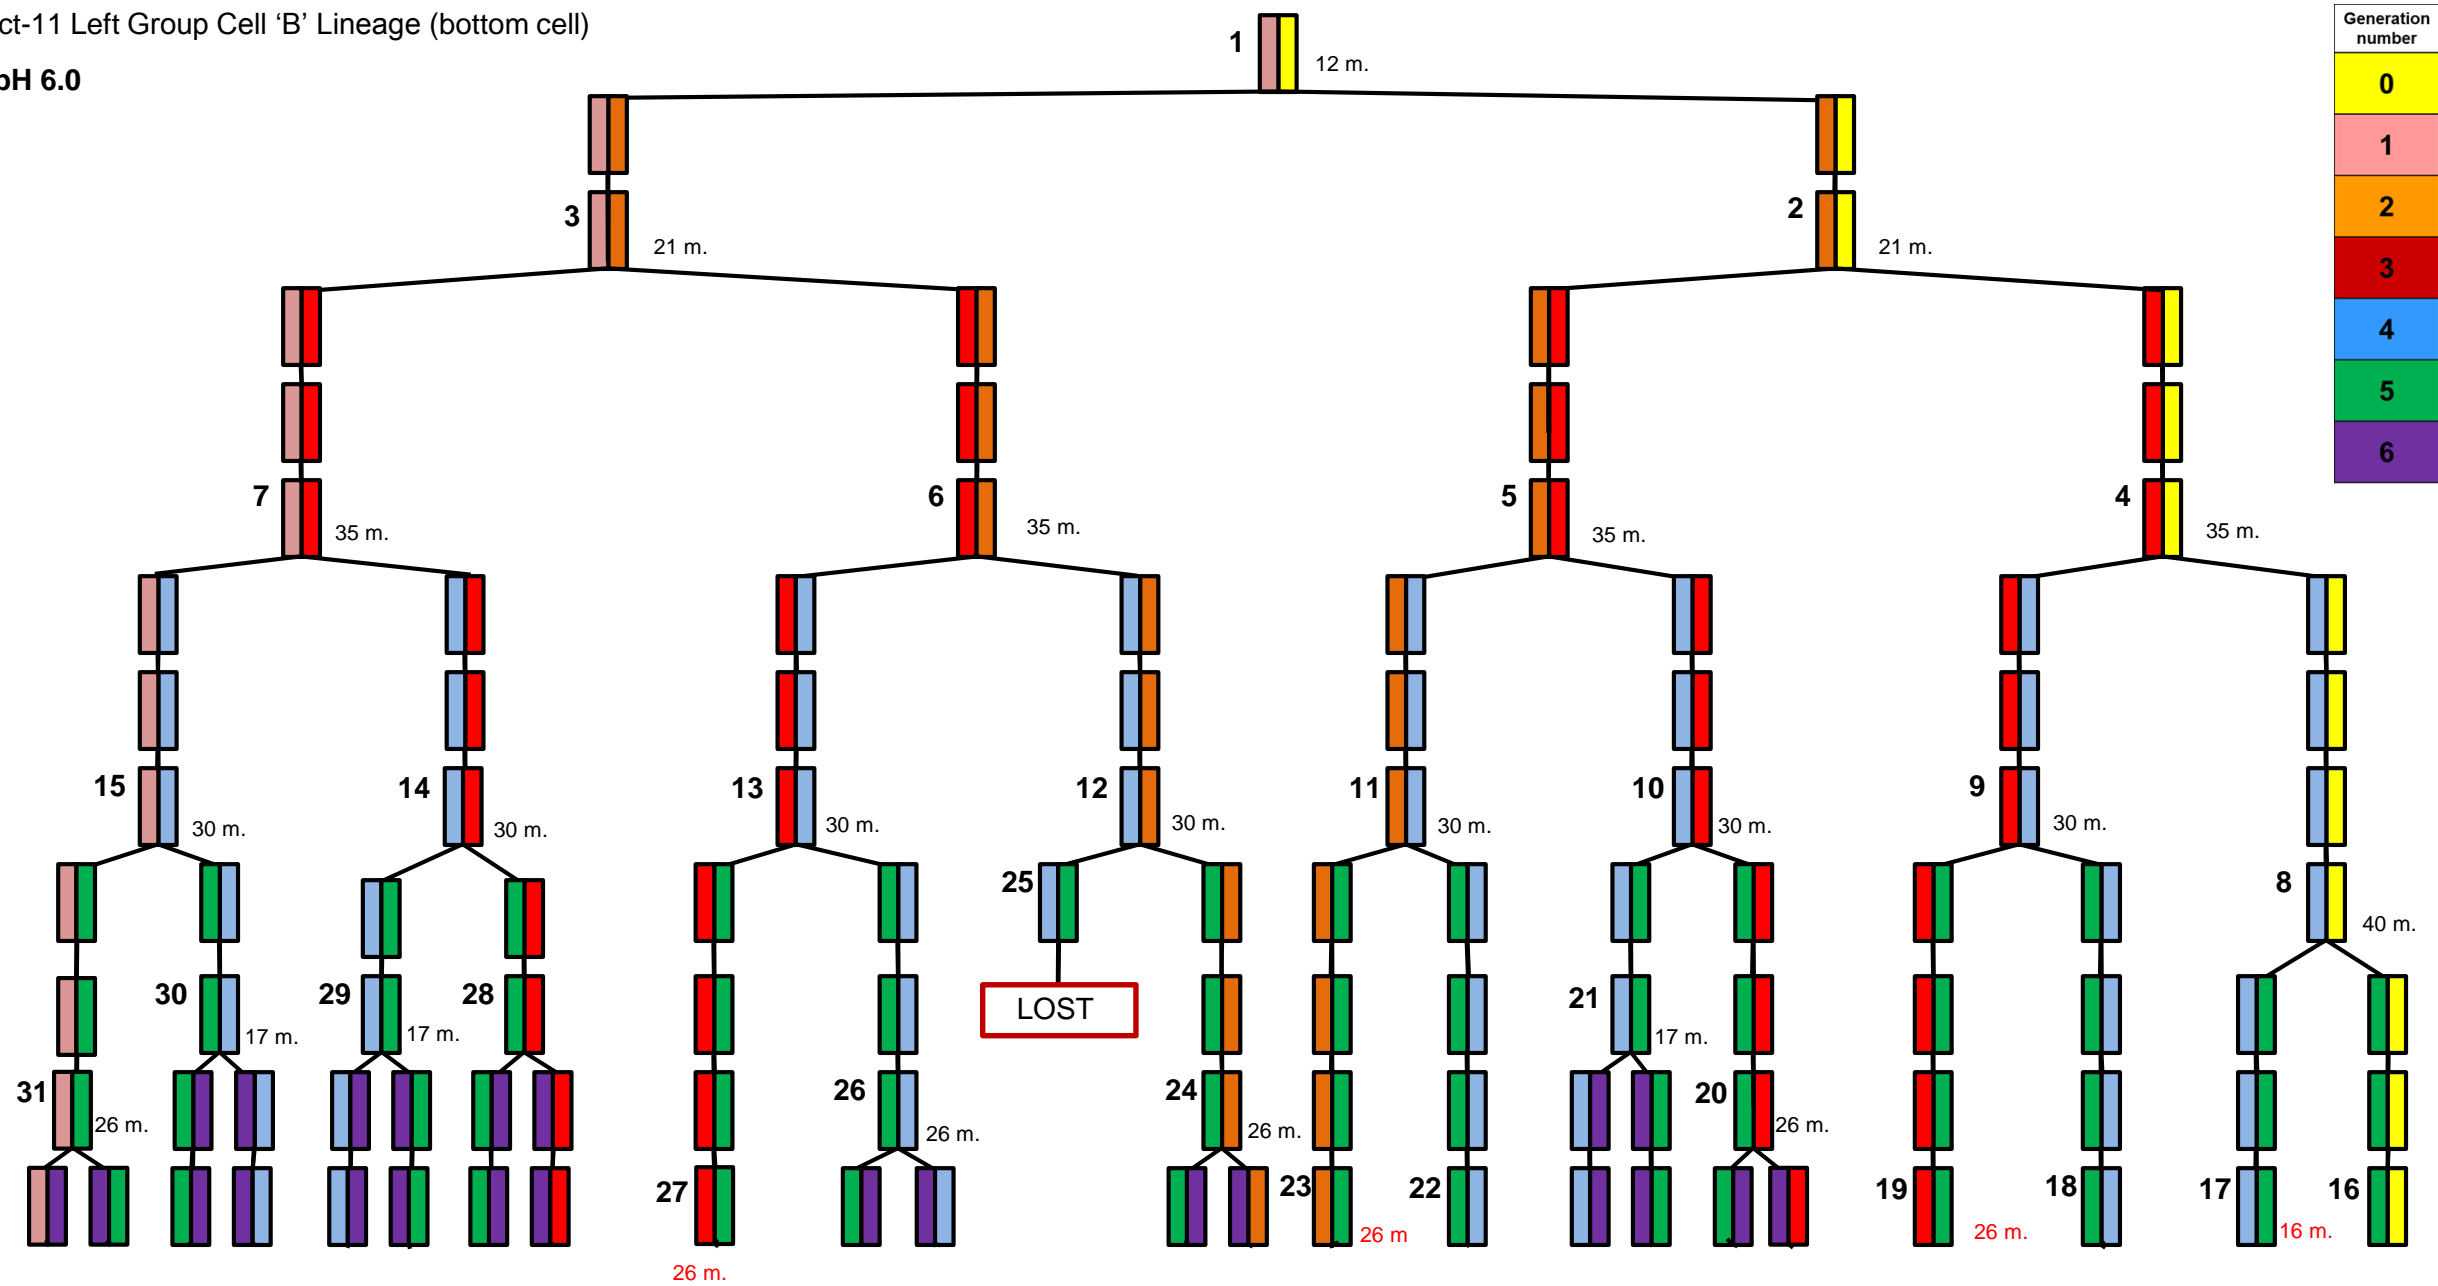

pH 6.0

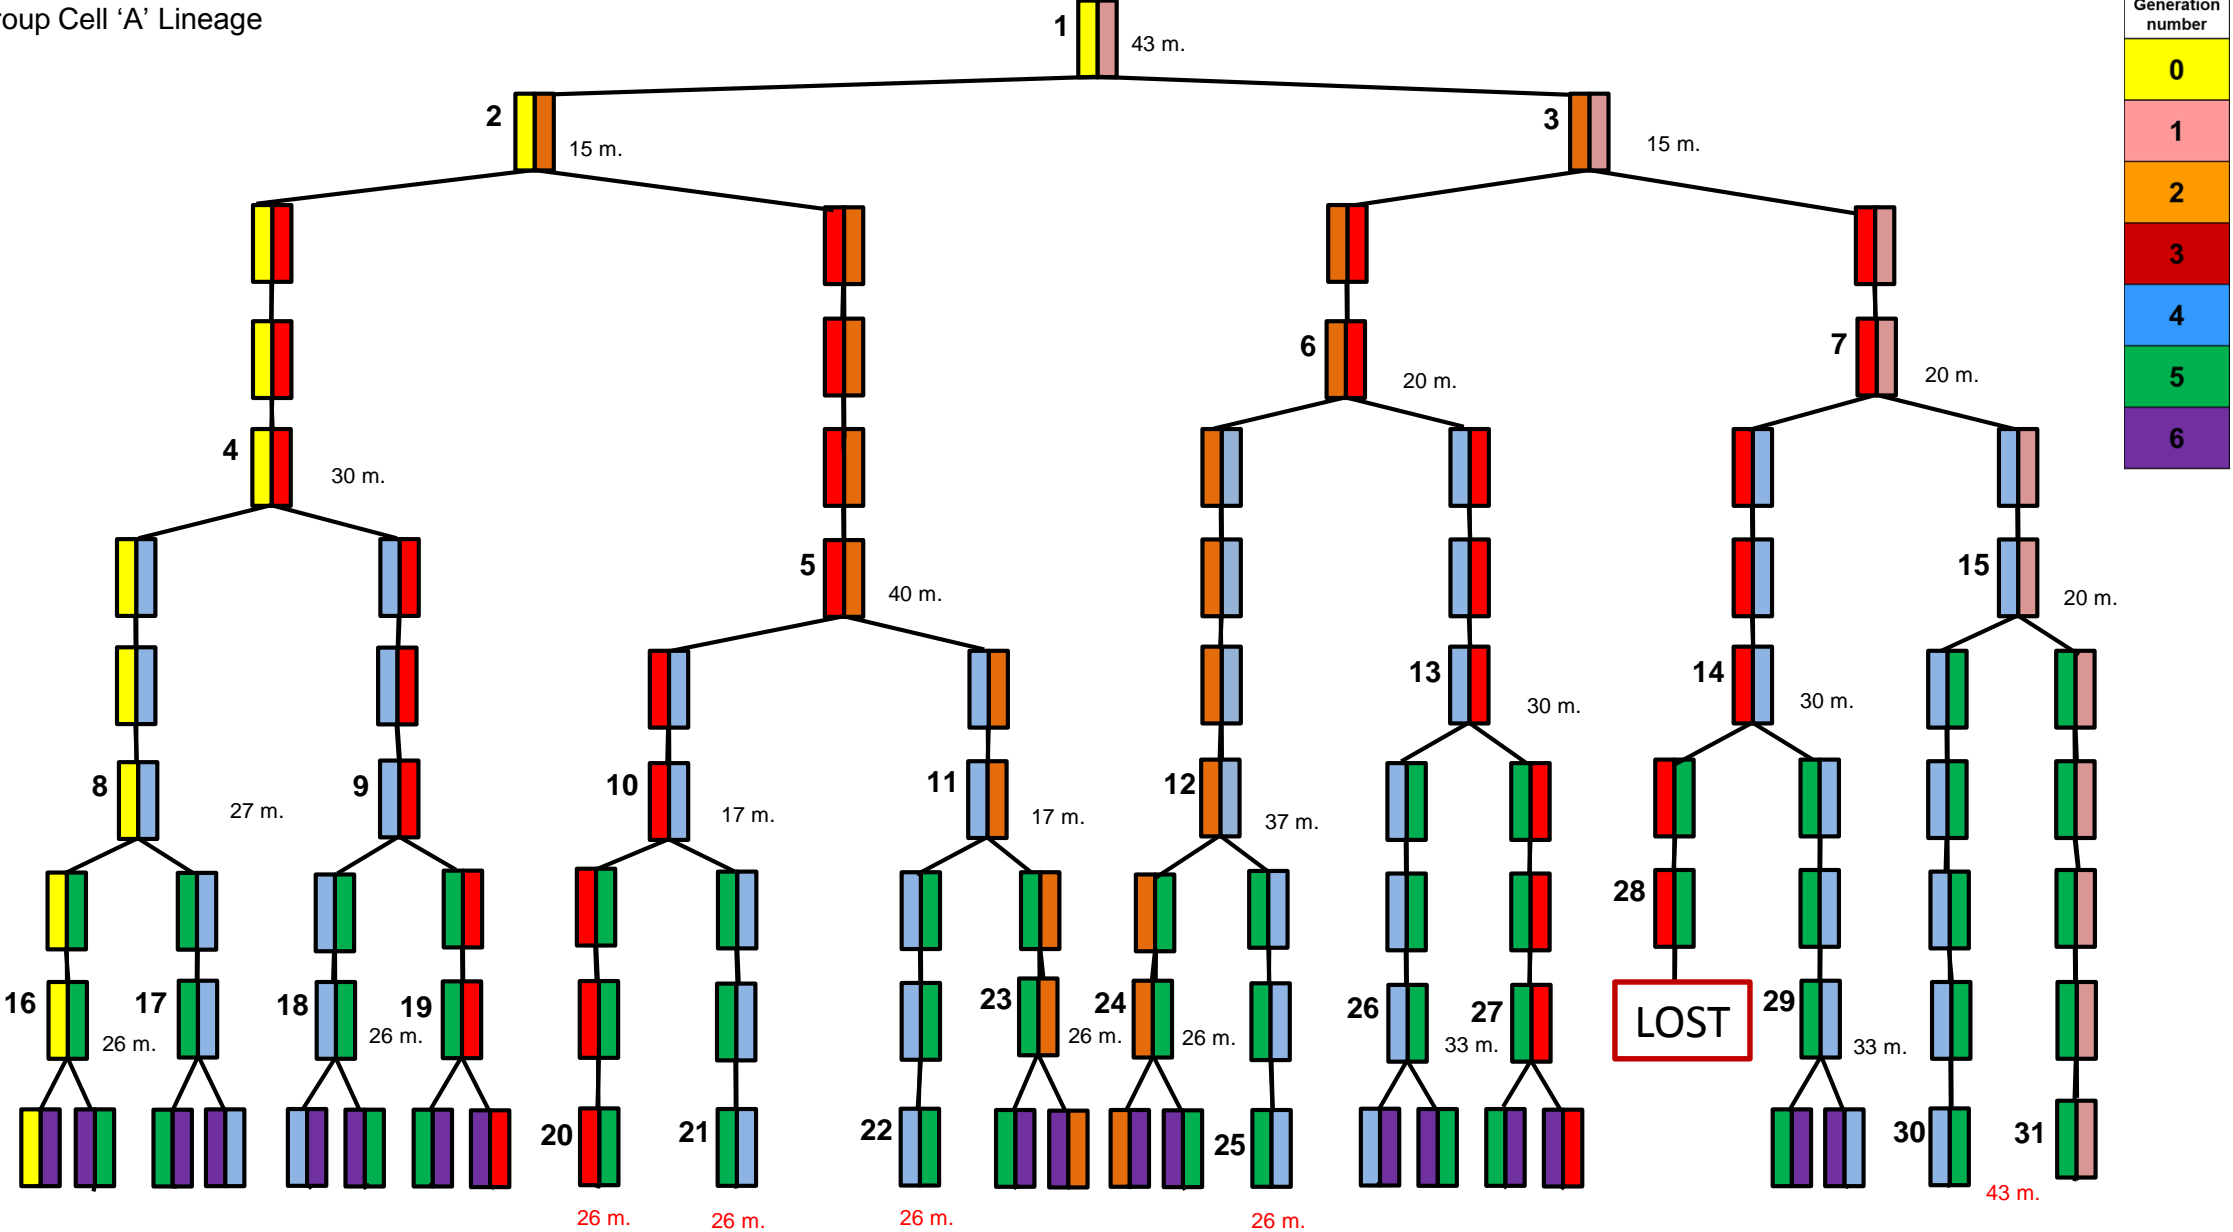

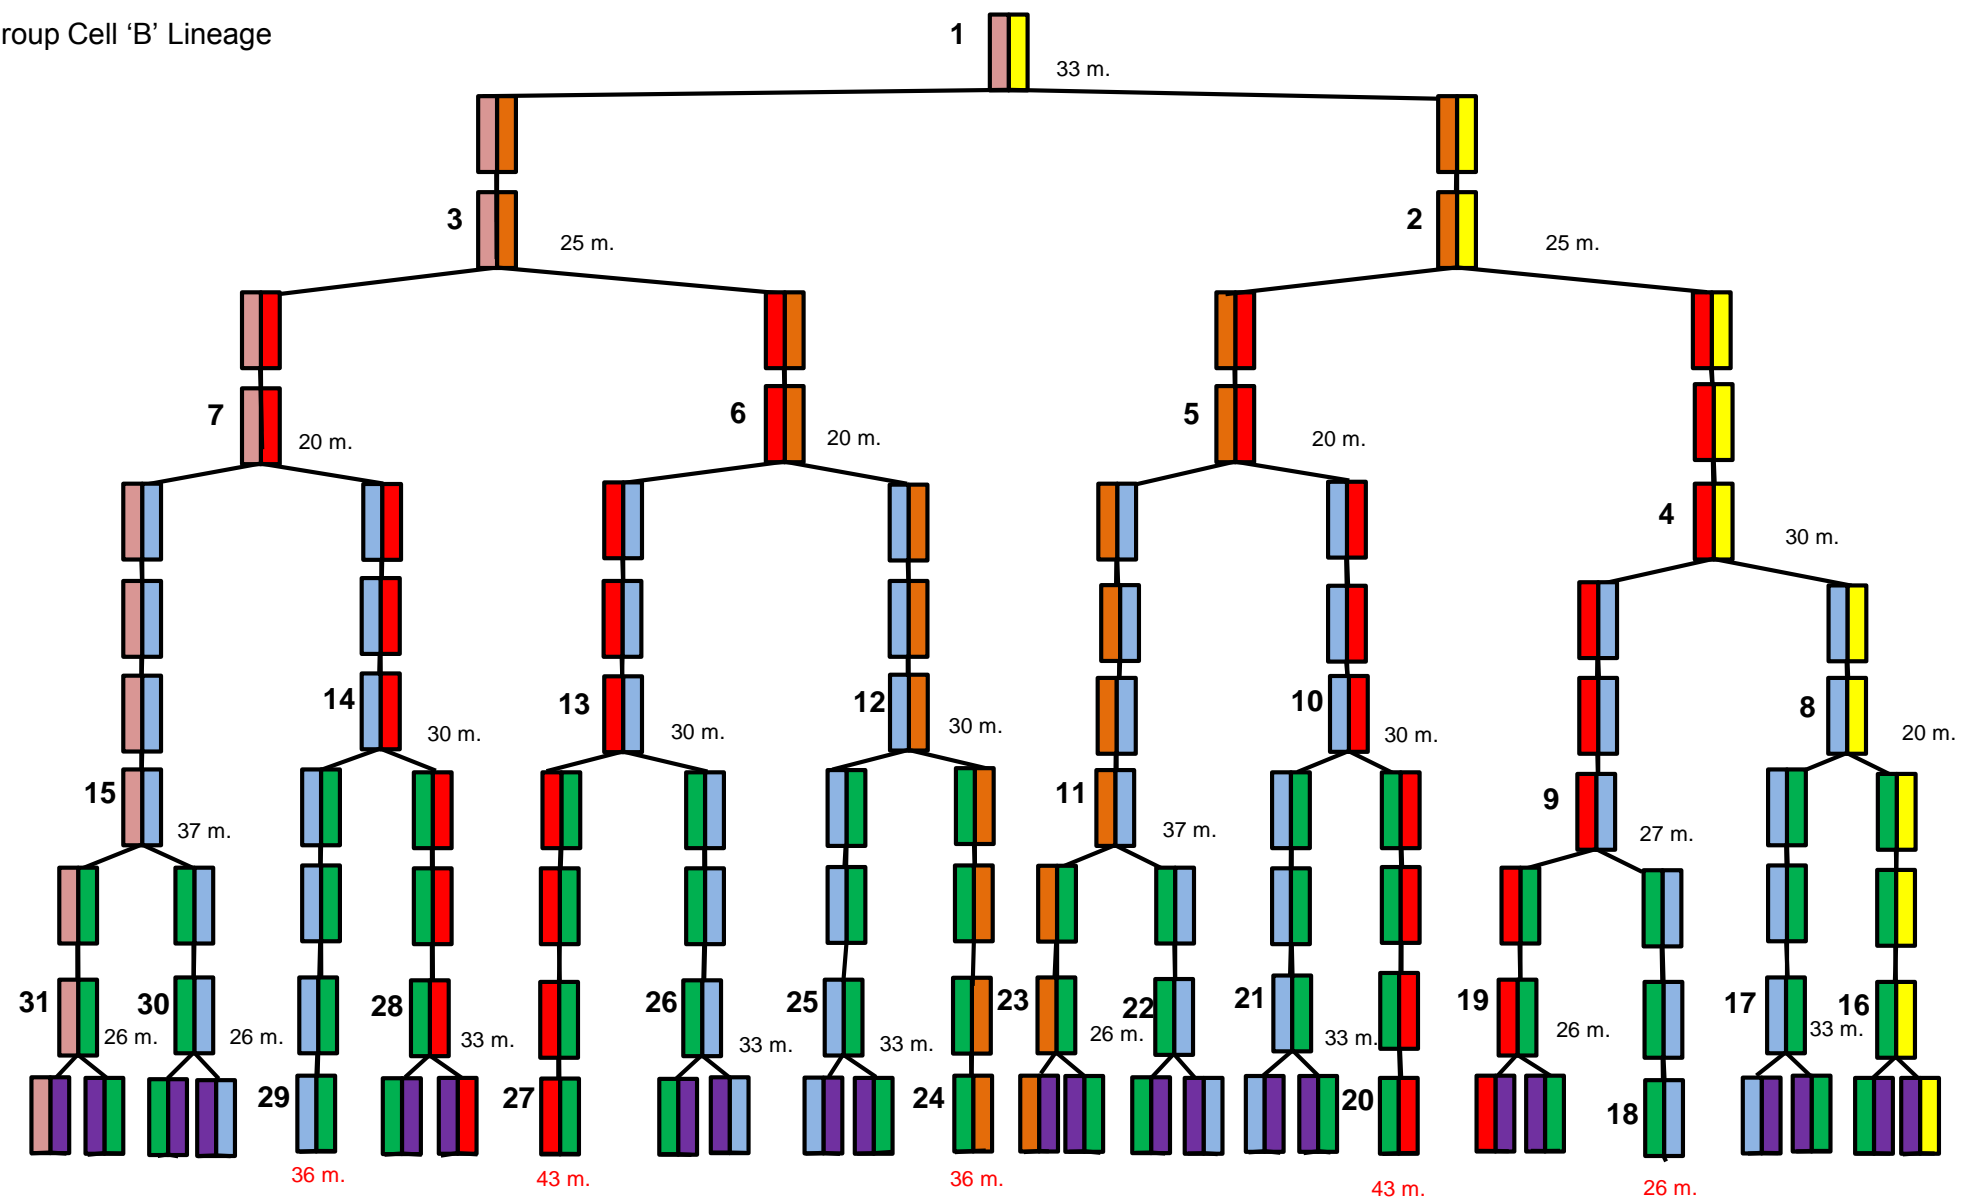

| Generation number |
|-------------------|
| 0                 |
| 1                 |
| 2                 |
| 3                 |
| 4                 |
| 5                 |
| 6                 |

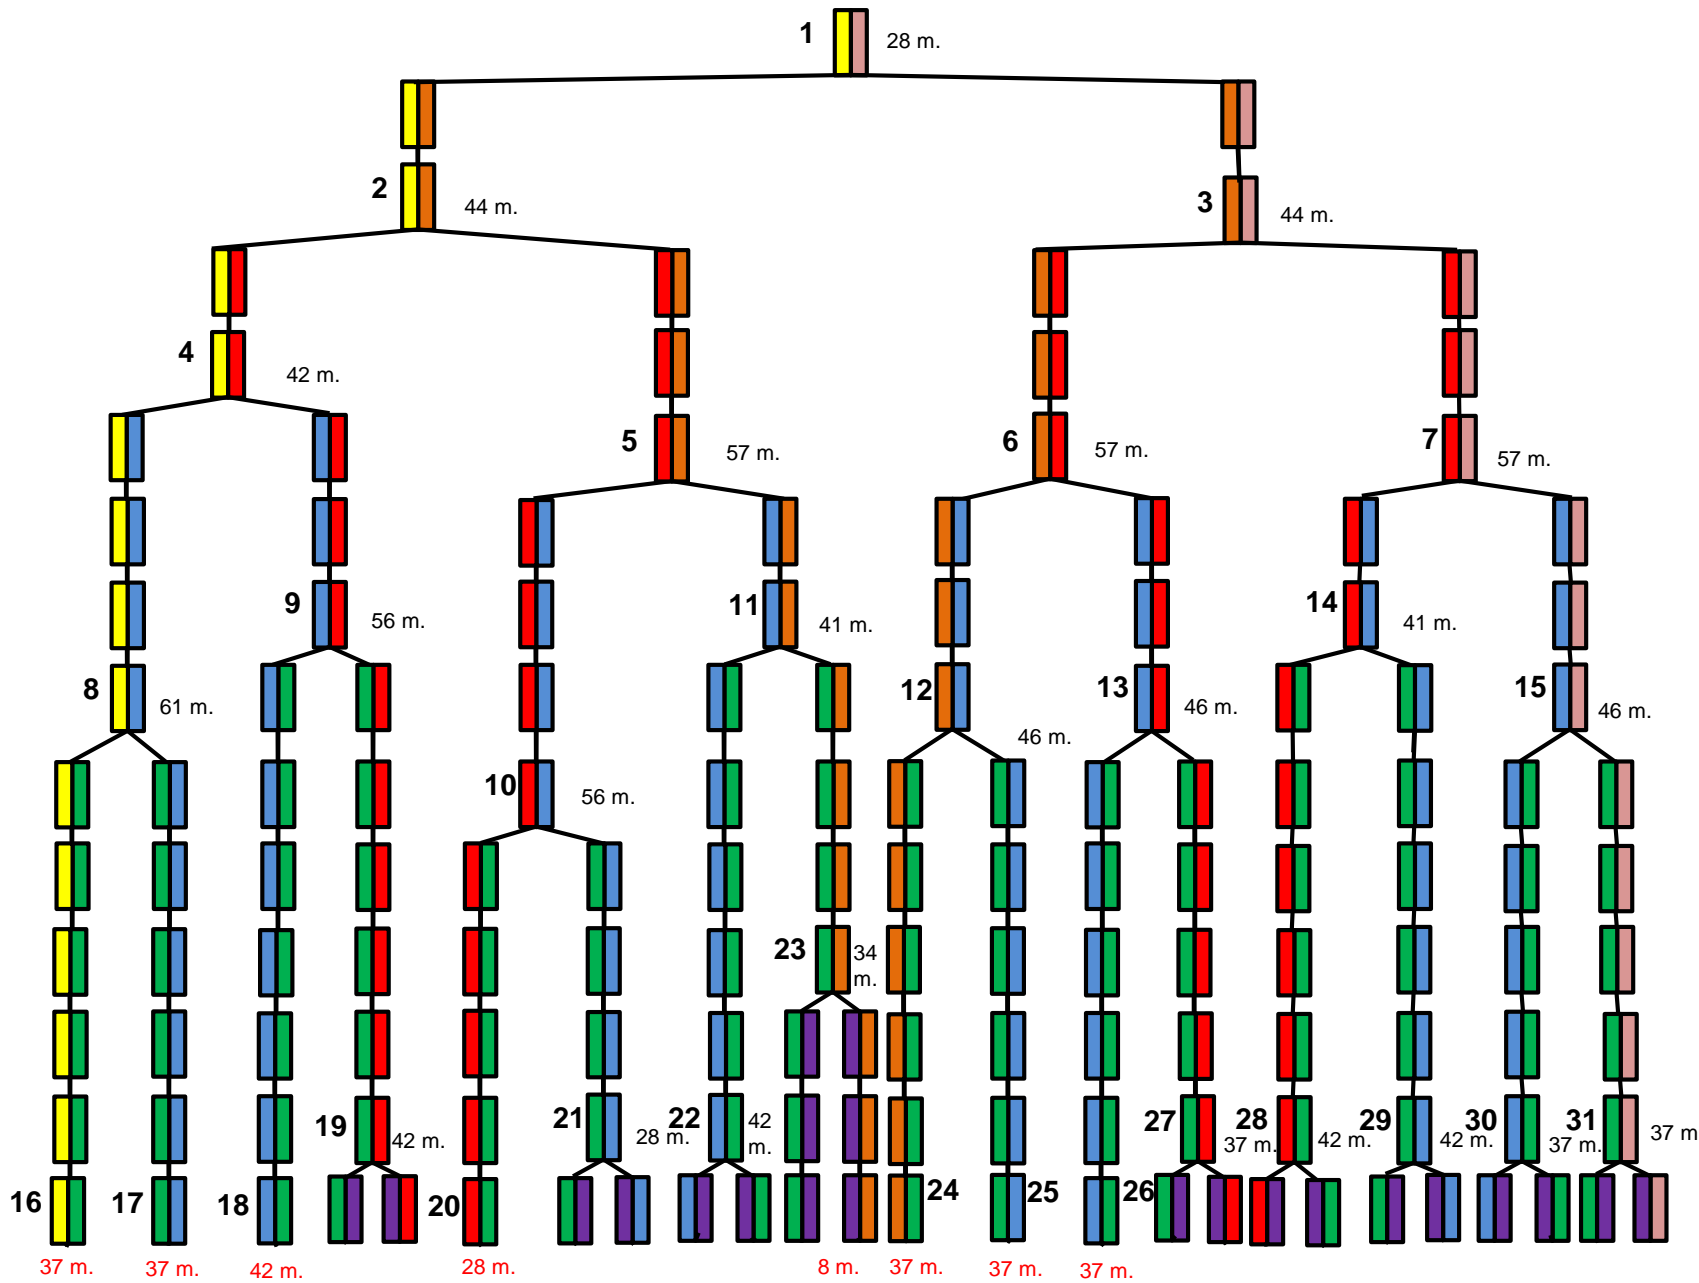

| Generation number |
|-------------------|
| 0                 |
| 1                 |
| 2                 |
| 3                 |
| 4                 |
| 5                 |
| 6                 |

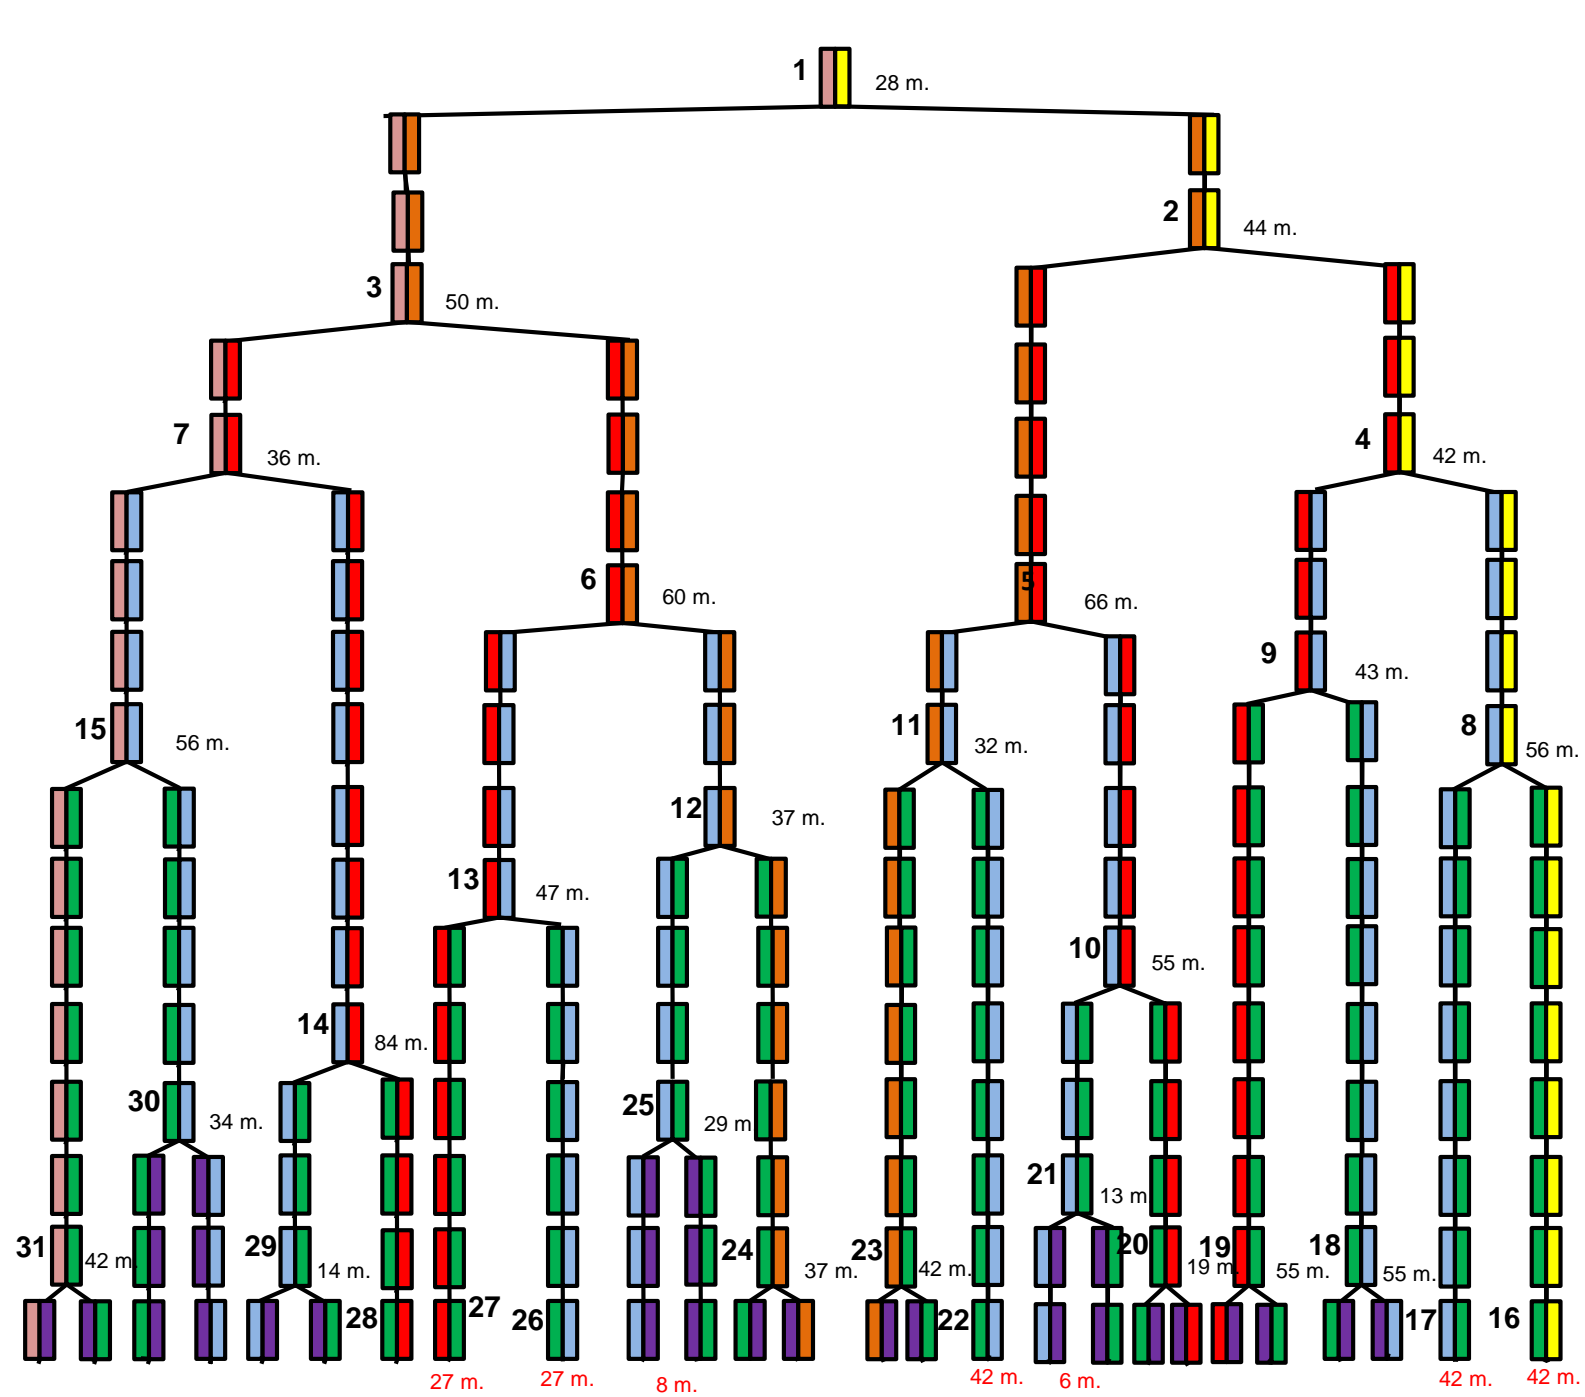

| Generation number |
|-------------------|
| 0                 |
| 1                 |
| 2                 |
| 3                 |
| 4                 |
| 5                 |
| 6                 |

pH 6.0

| Generation number |
|-------------------|
| 0                 |
| 1                 |
| 2                 |
| 3                 |
| 4                 |
| 5                 |
| 6                 |

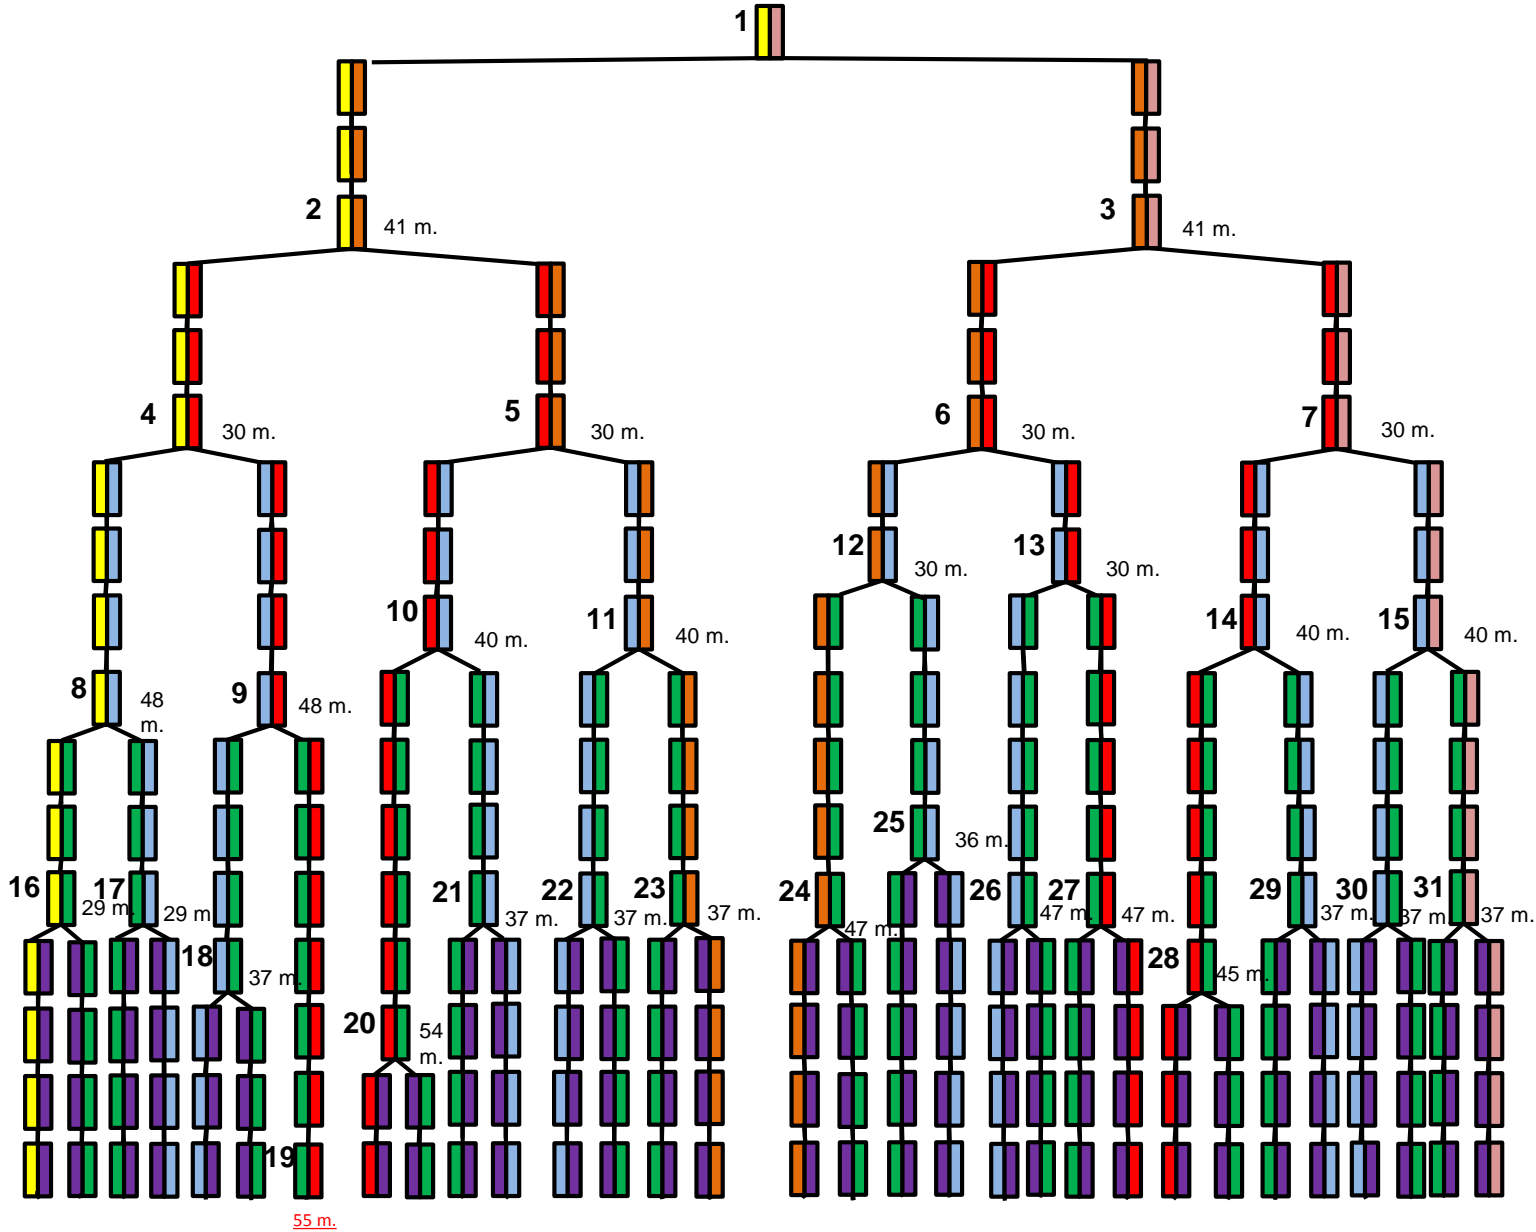

| Generation number |
|-------------------|
| 0                 |
| 1                 |
| 2                 |
| 3                 |
| 4                 |
| 5                 |
| 6                 |

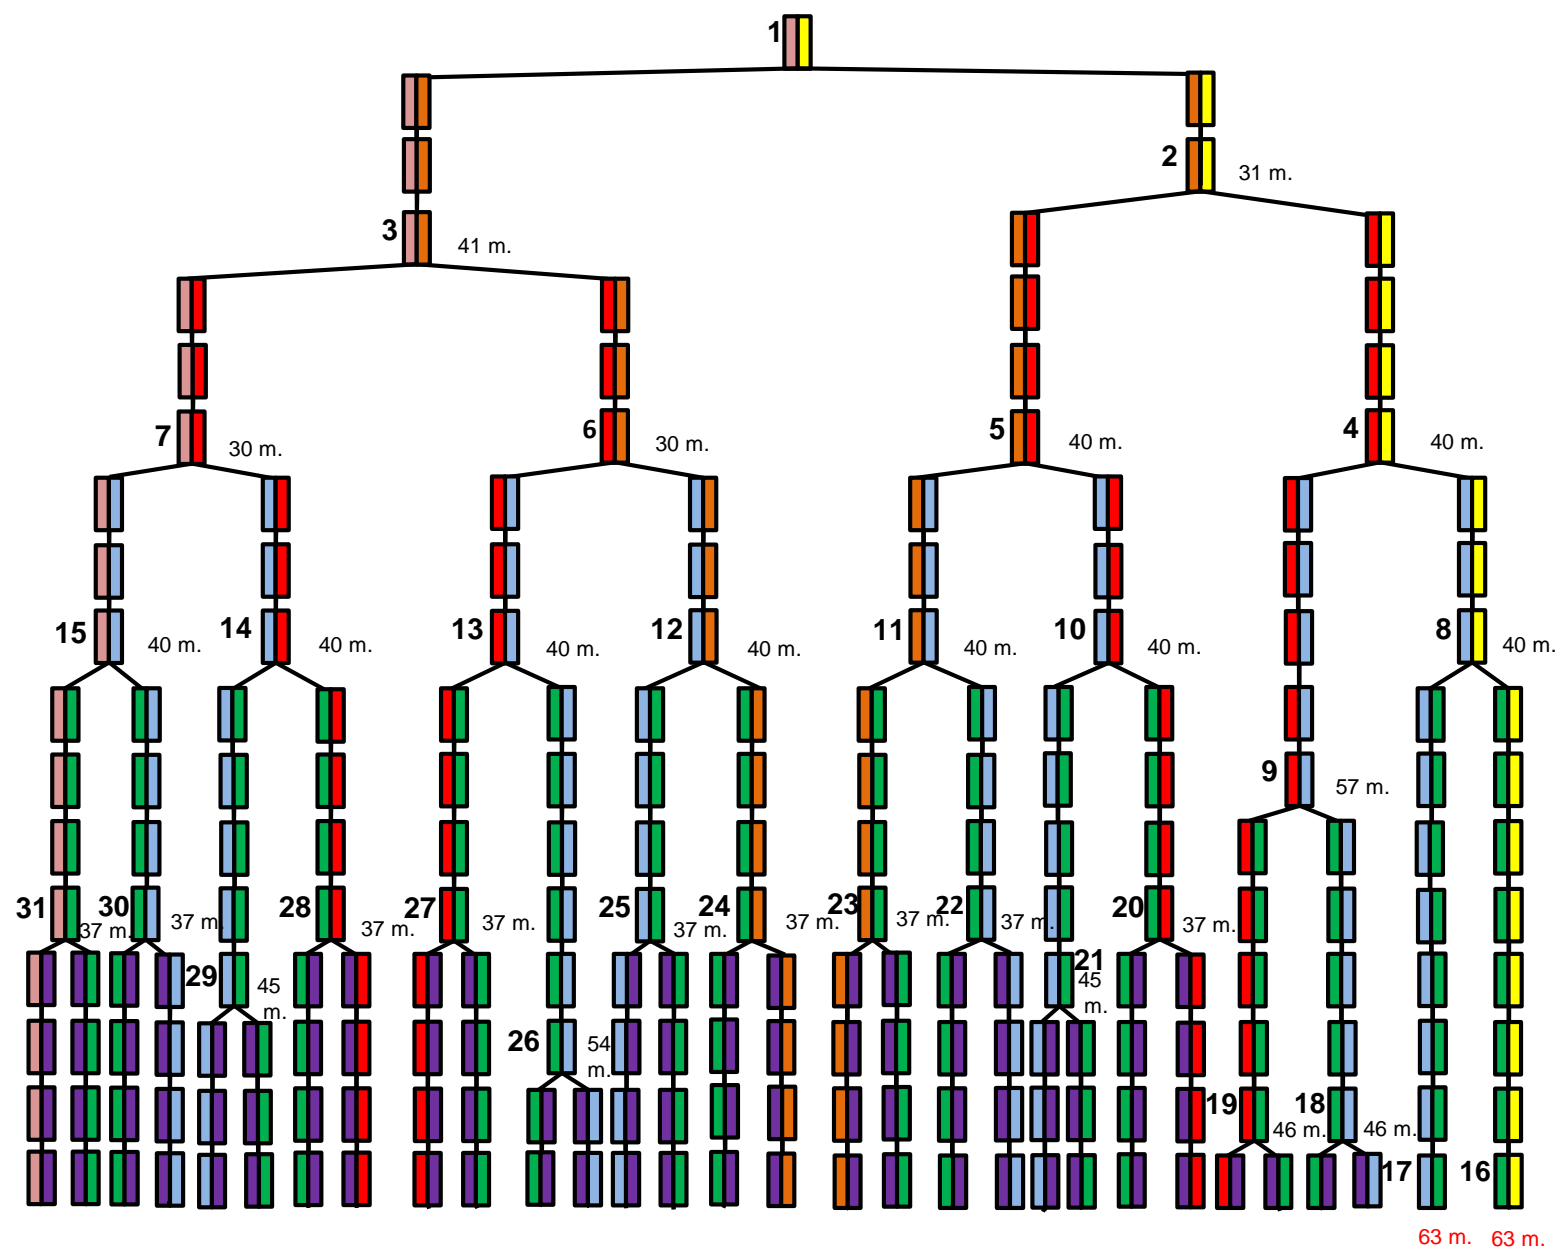

pH 6.0

| Generation number |
|-------------------|
| 0                 |
| 1                 |
| 2                 |
| 3                 |
| 4                 |
| 5                 |
| 6                 |

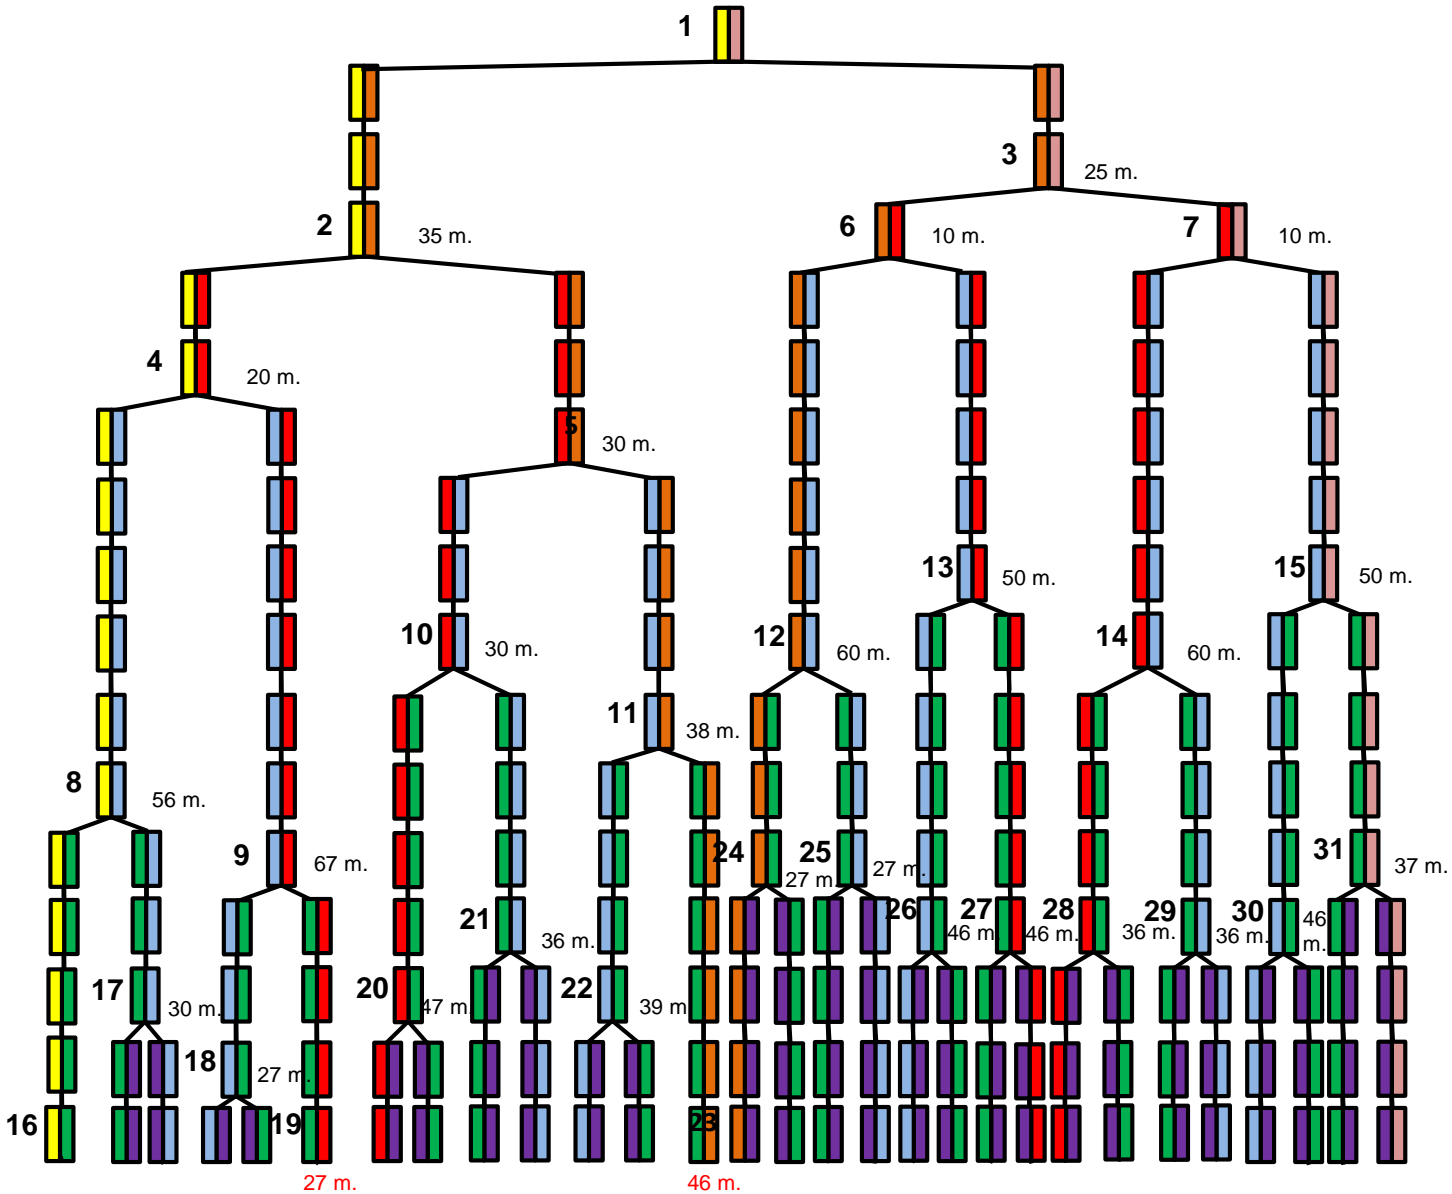

pH 6.0

| Generation number |
|-------------------|
| 0                 |
| 1                 |
| 2                 |
| 3                 |
| 4                 |
| 5                 |
| 6                 |

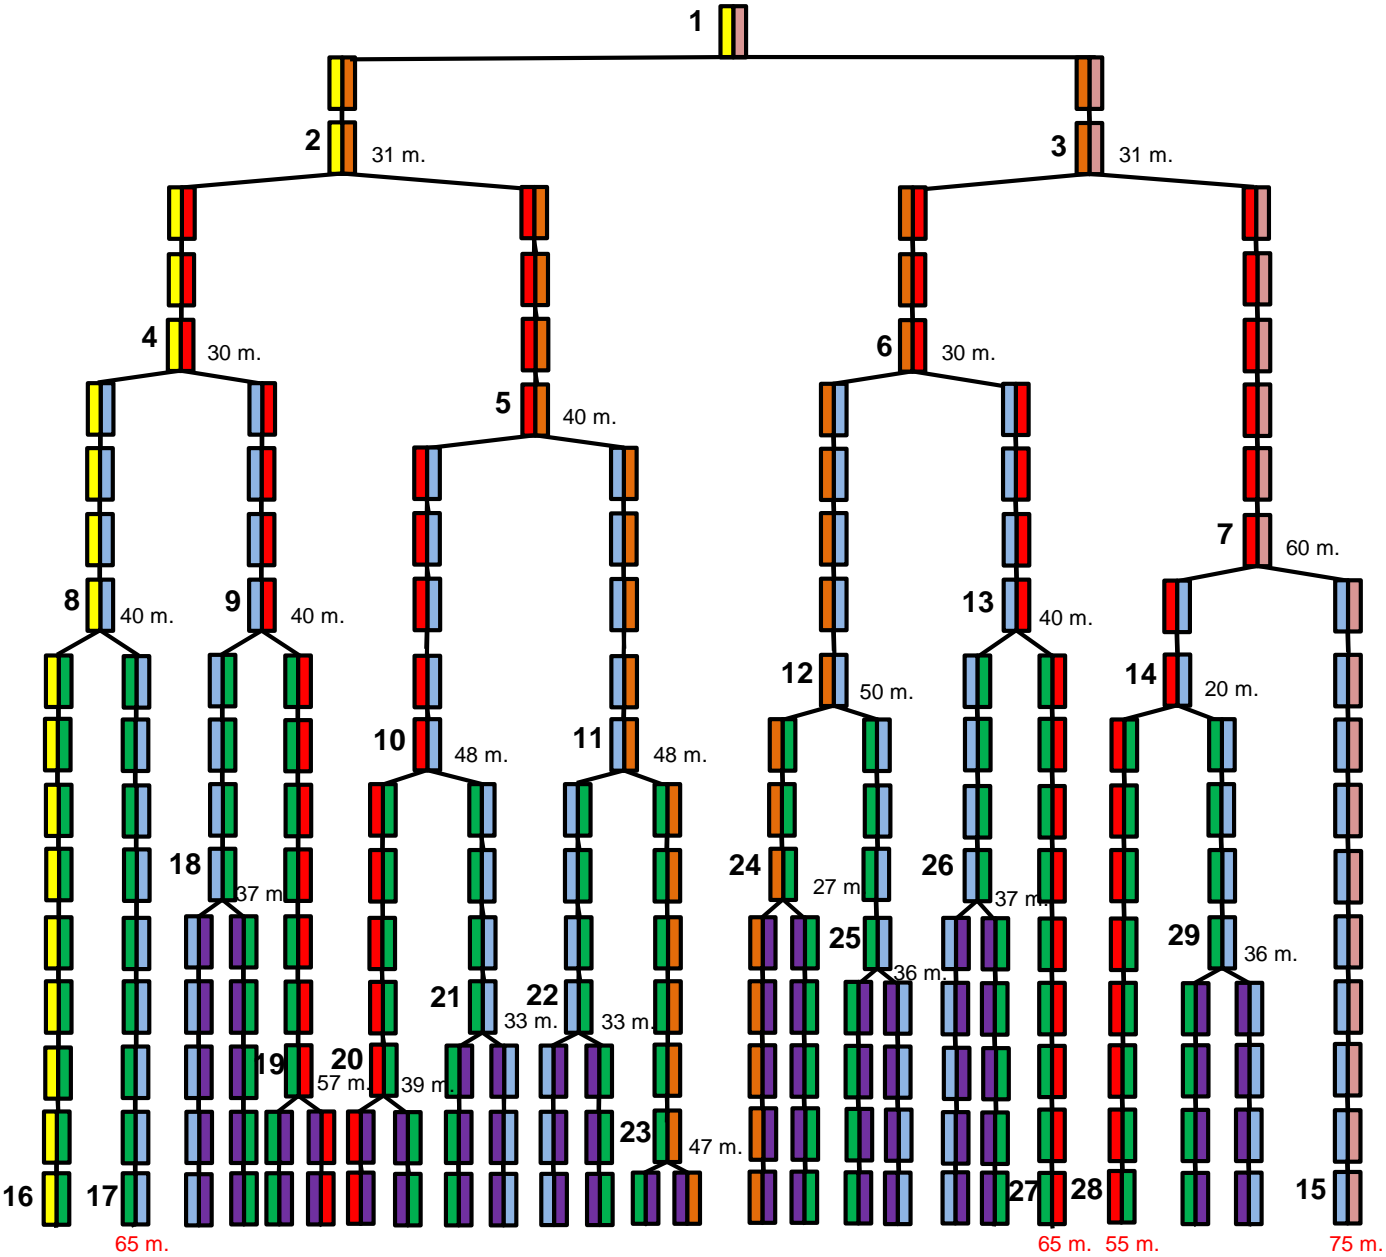

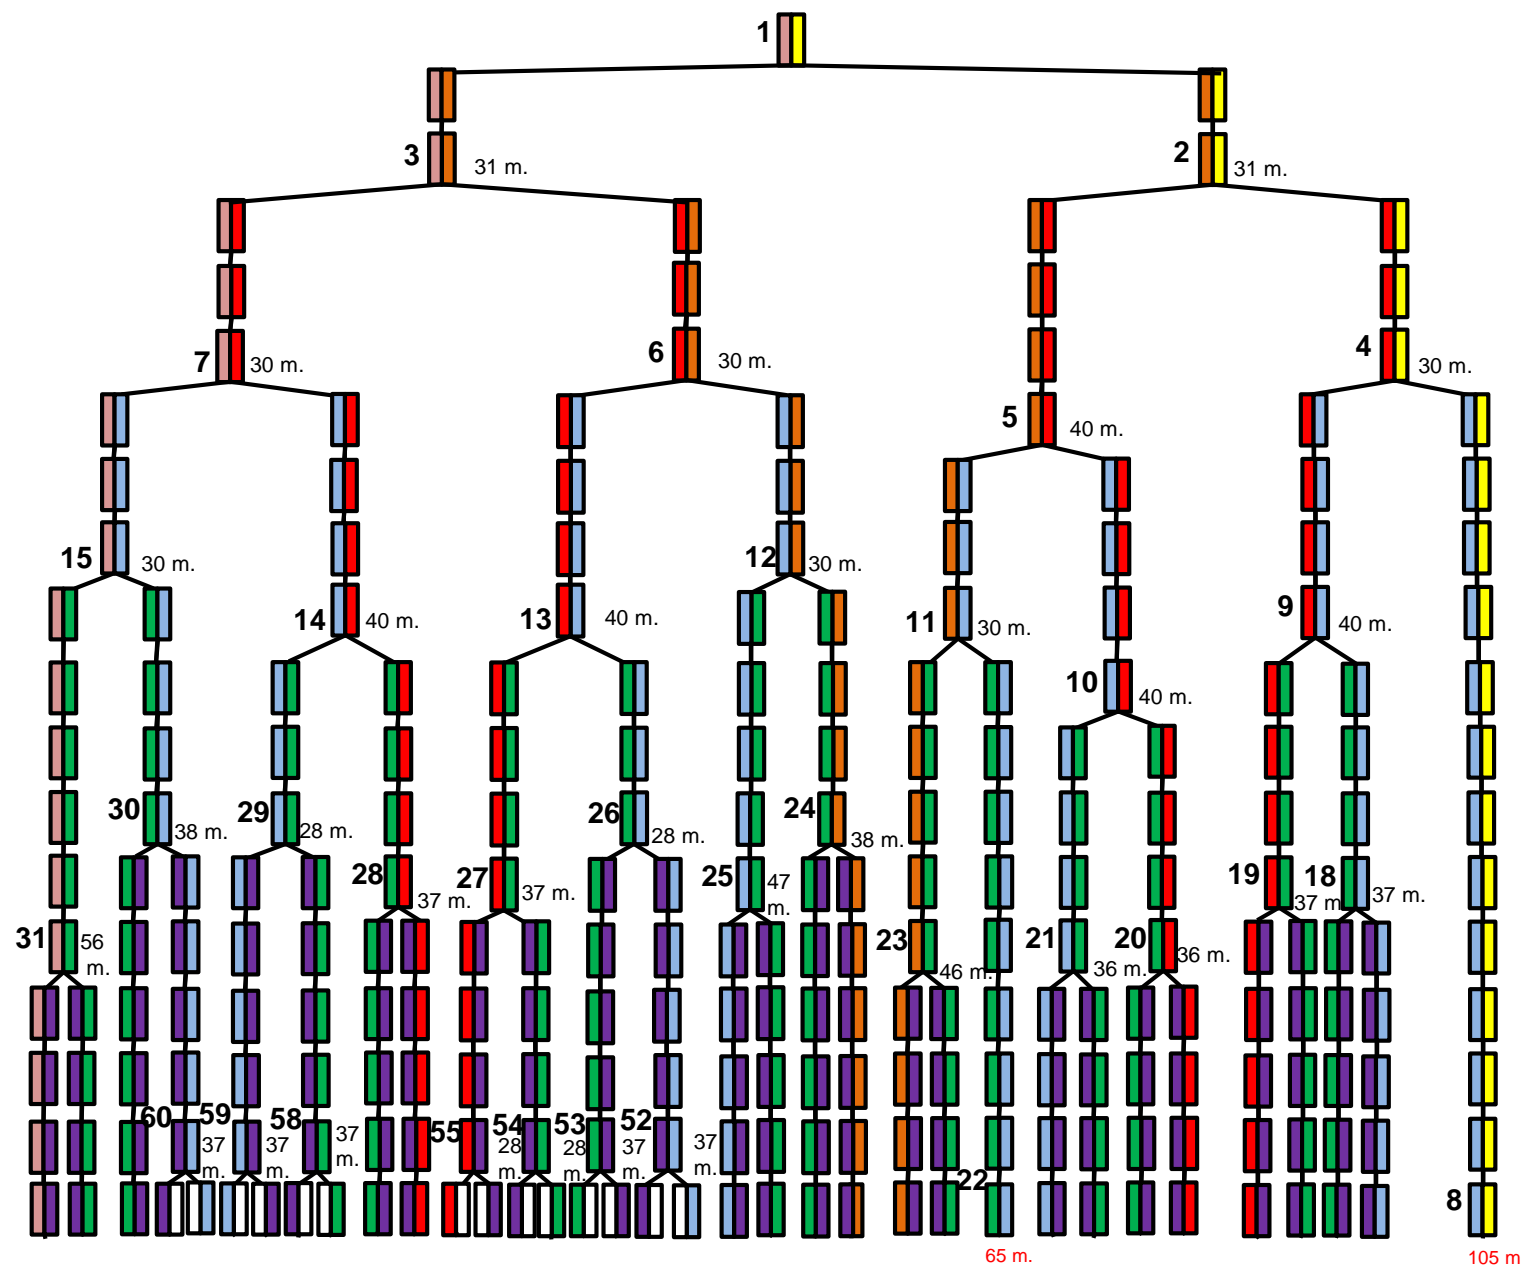

S1 Figure B. Cell Lineages at pH 7.5

2014-Jan-27 Cell 'A' Lineage  
pH 7.5

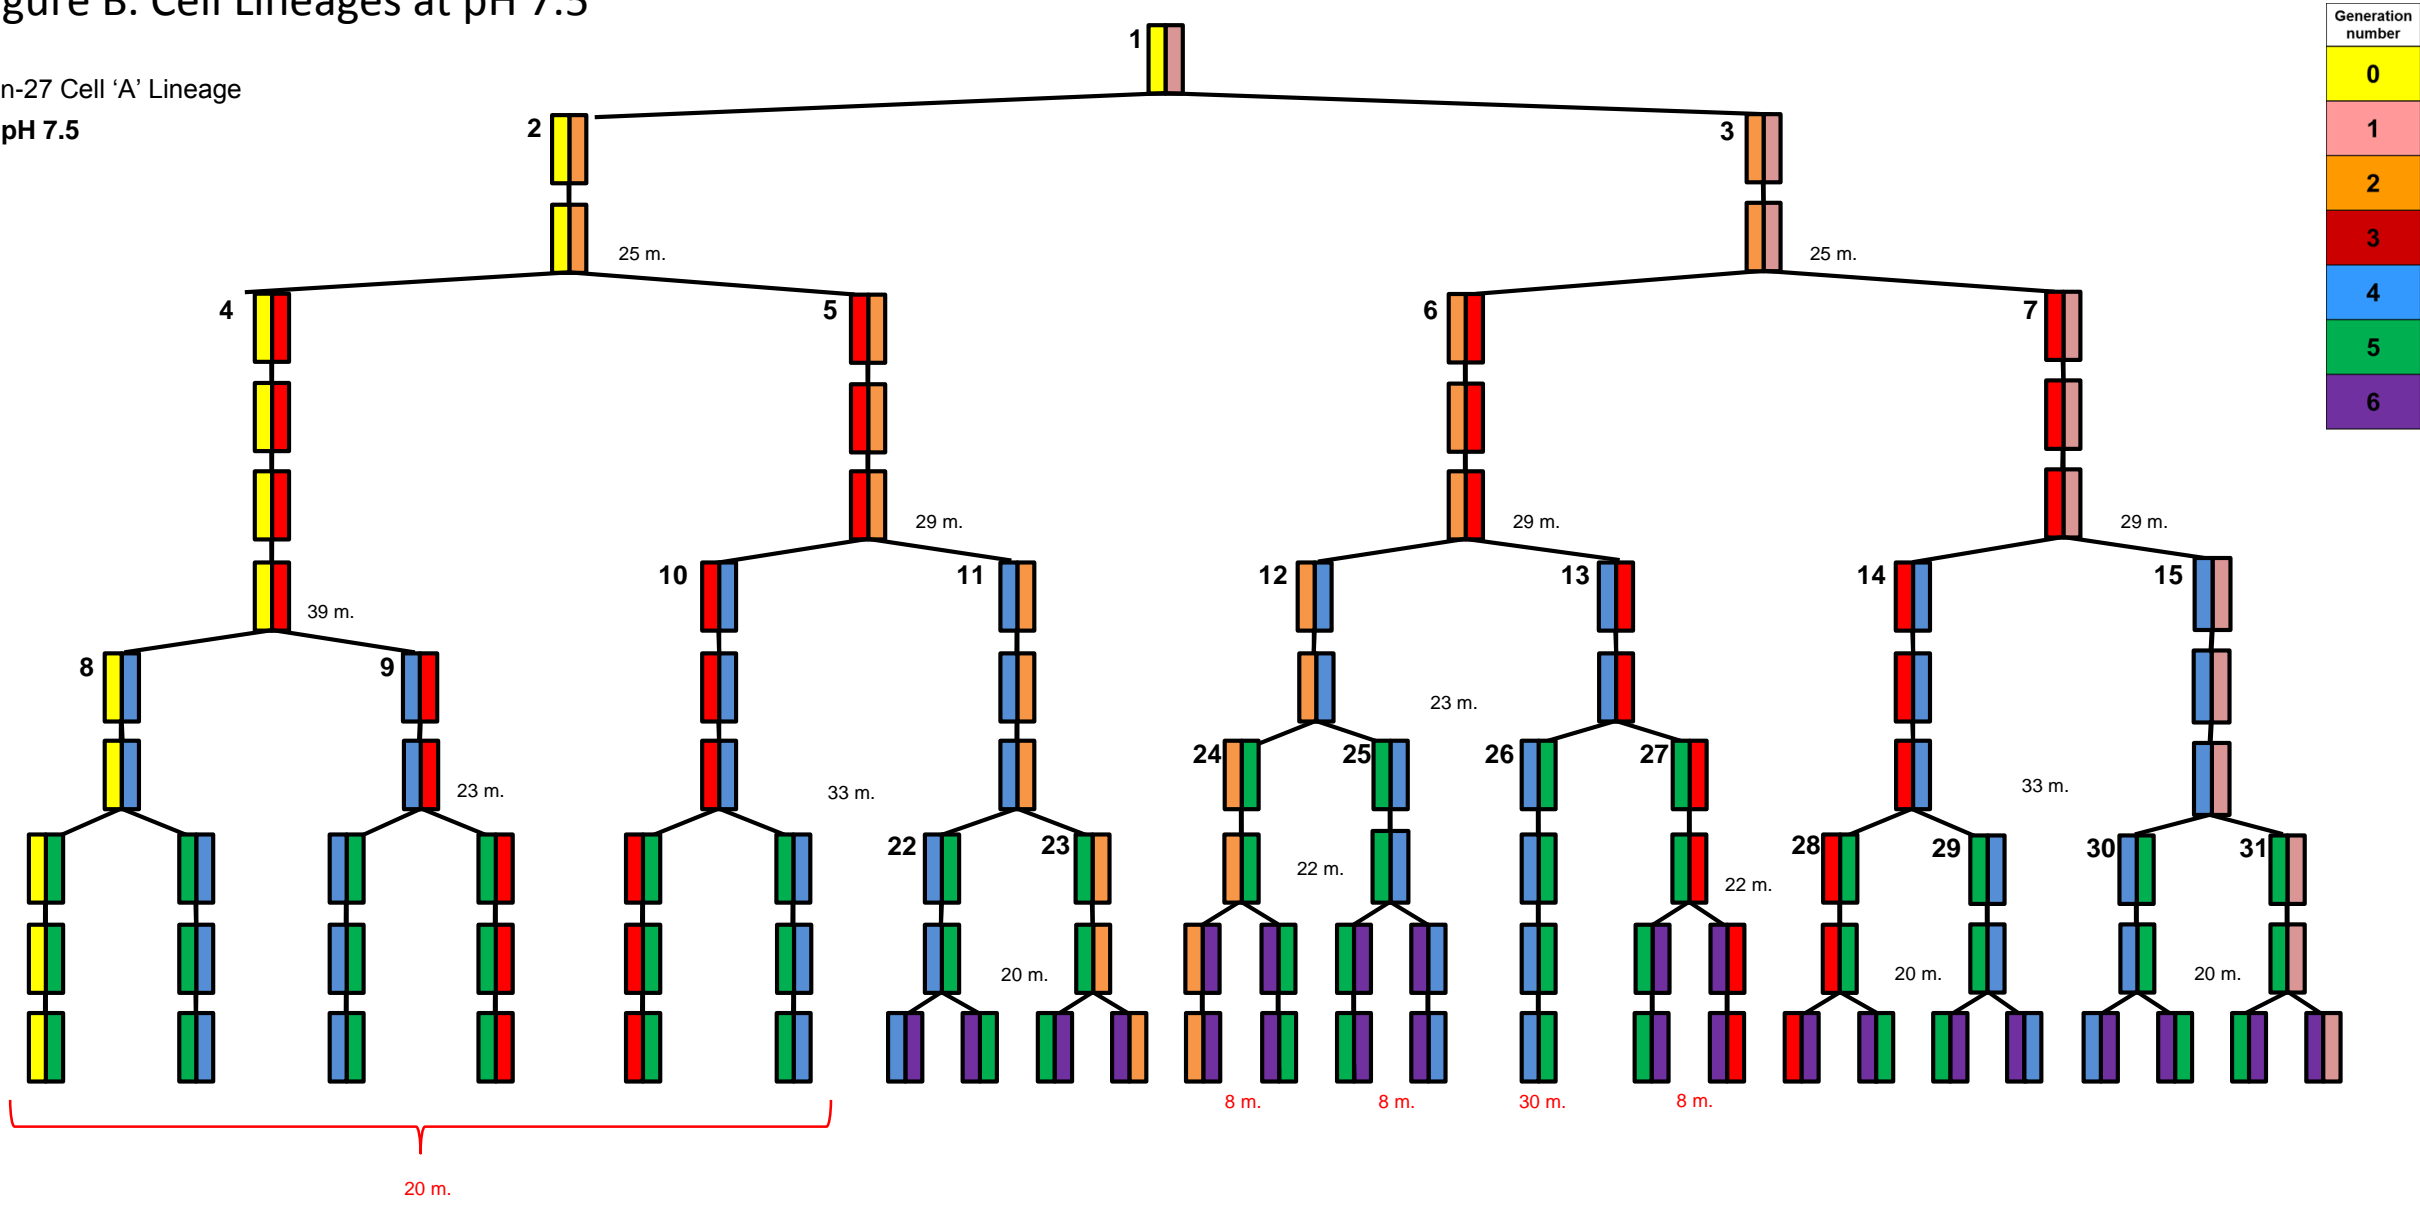

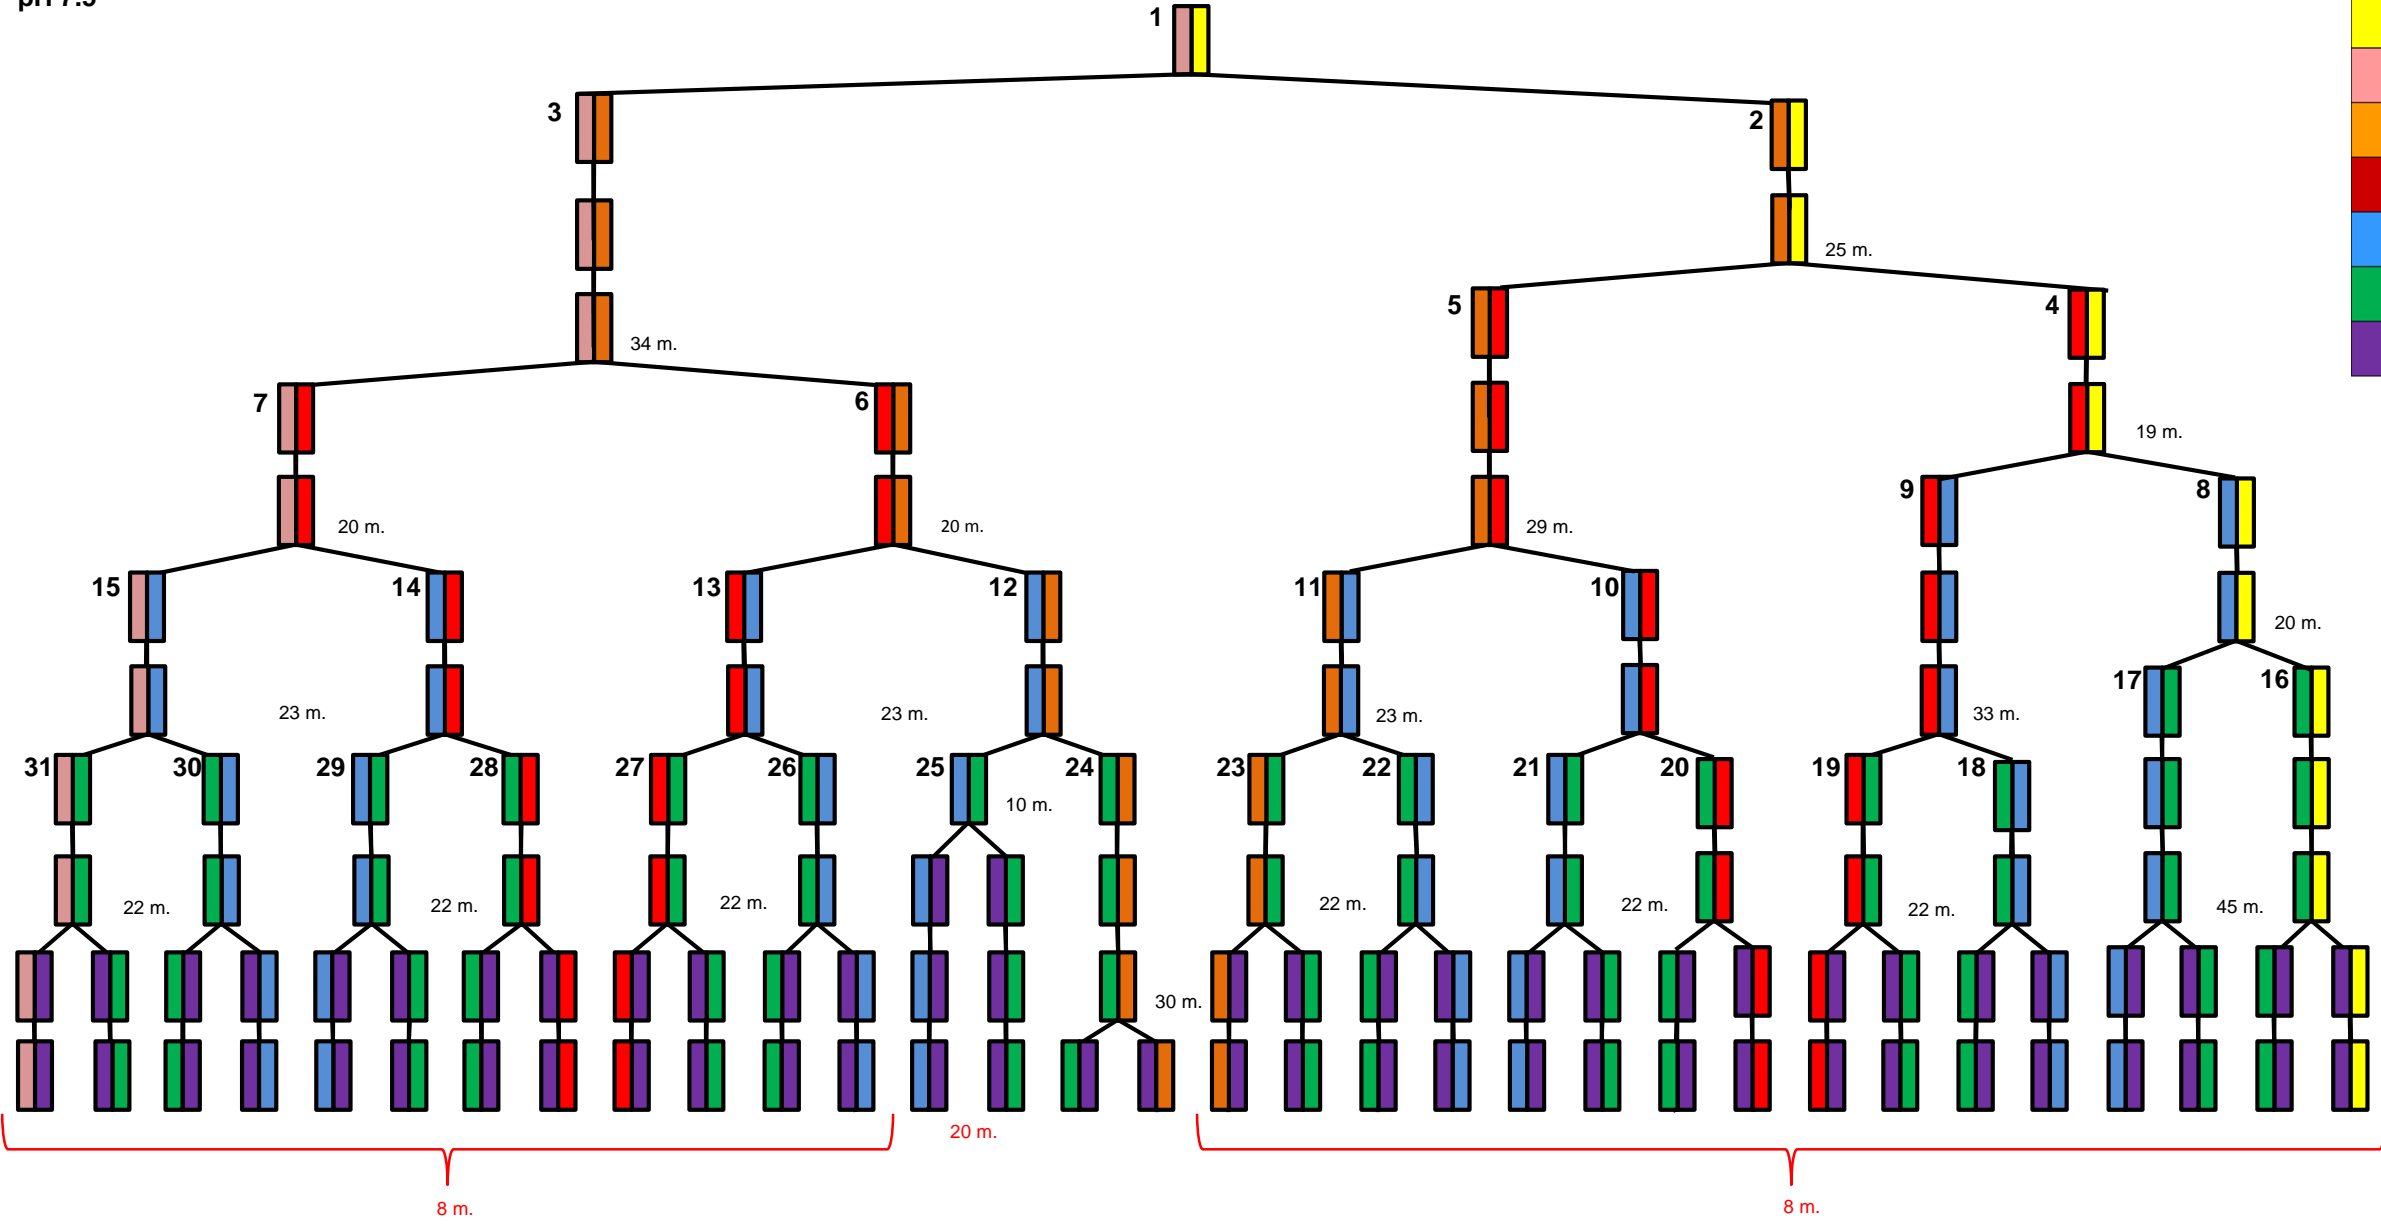

2014-Apr-23 Cell 'A' Lineage  
pH 7.5

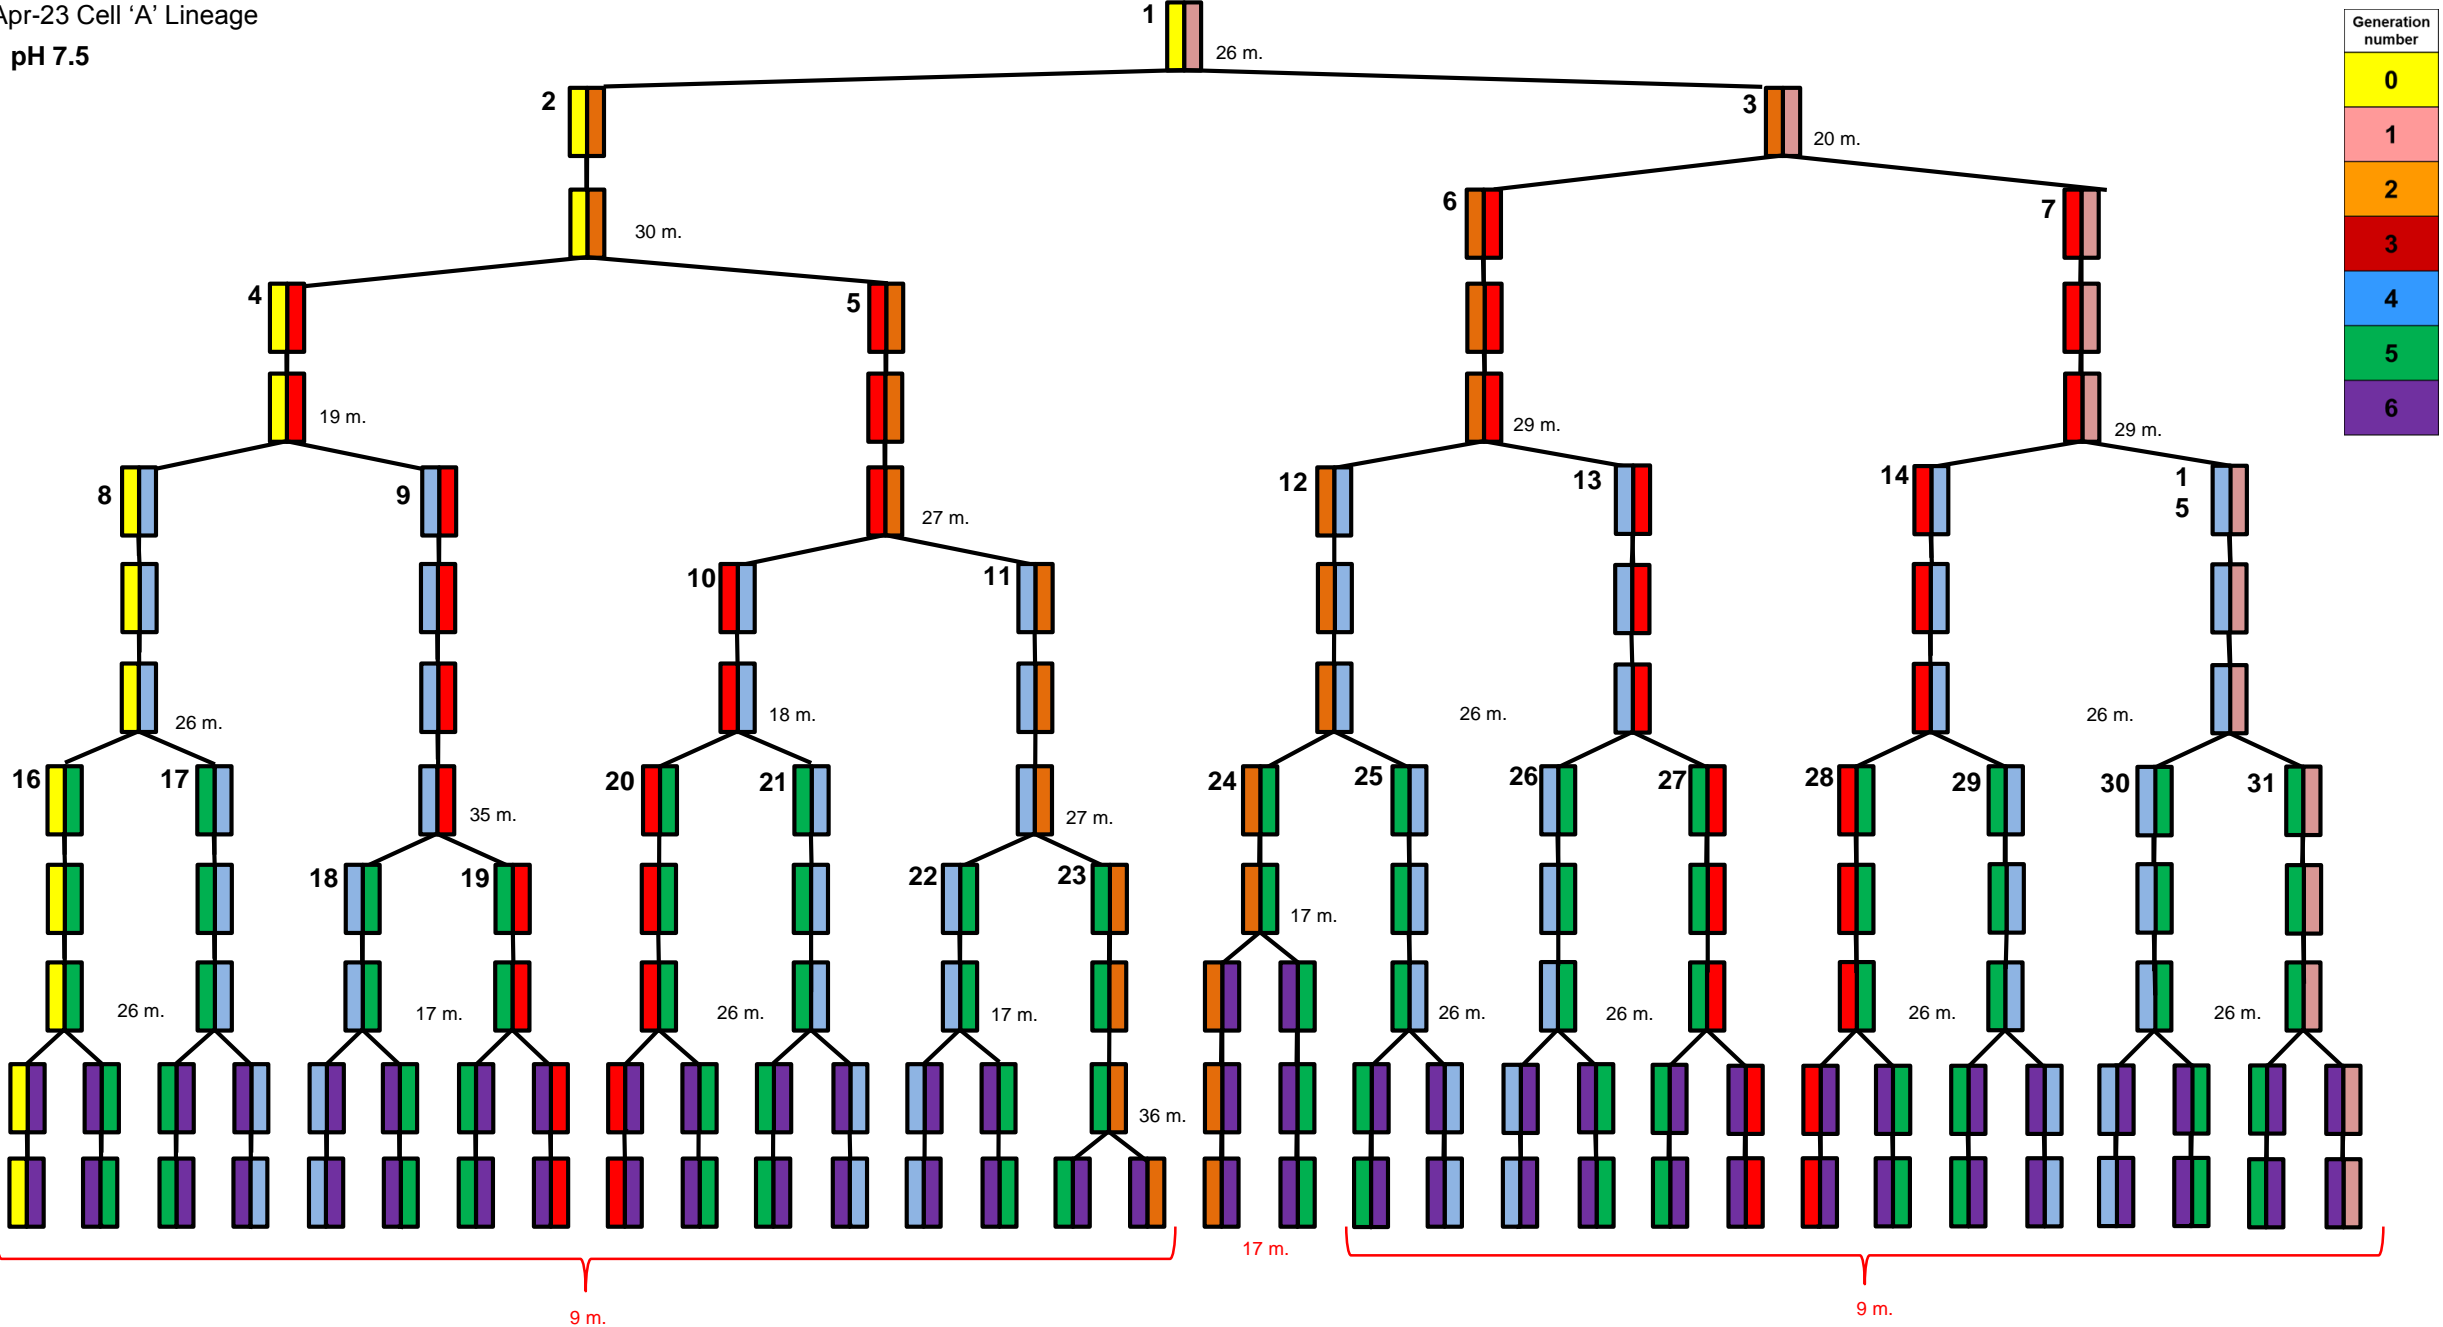

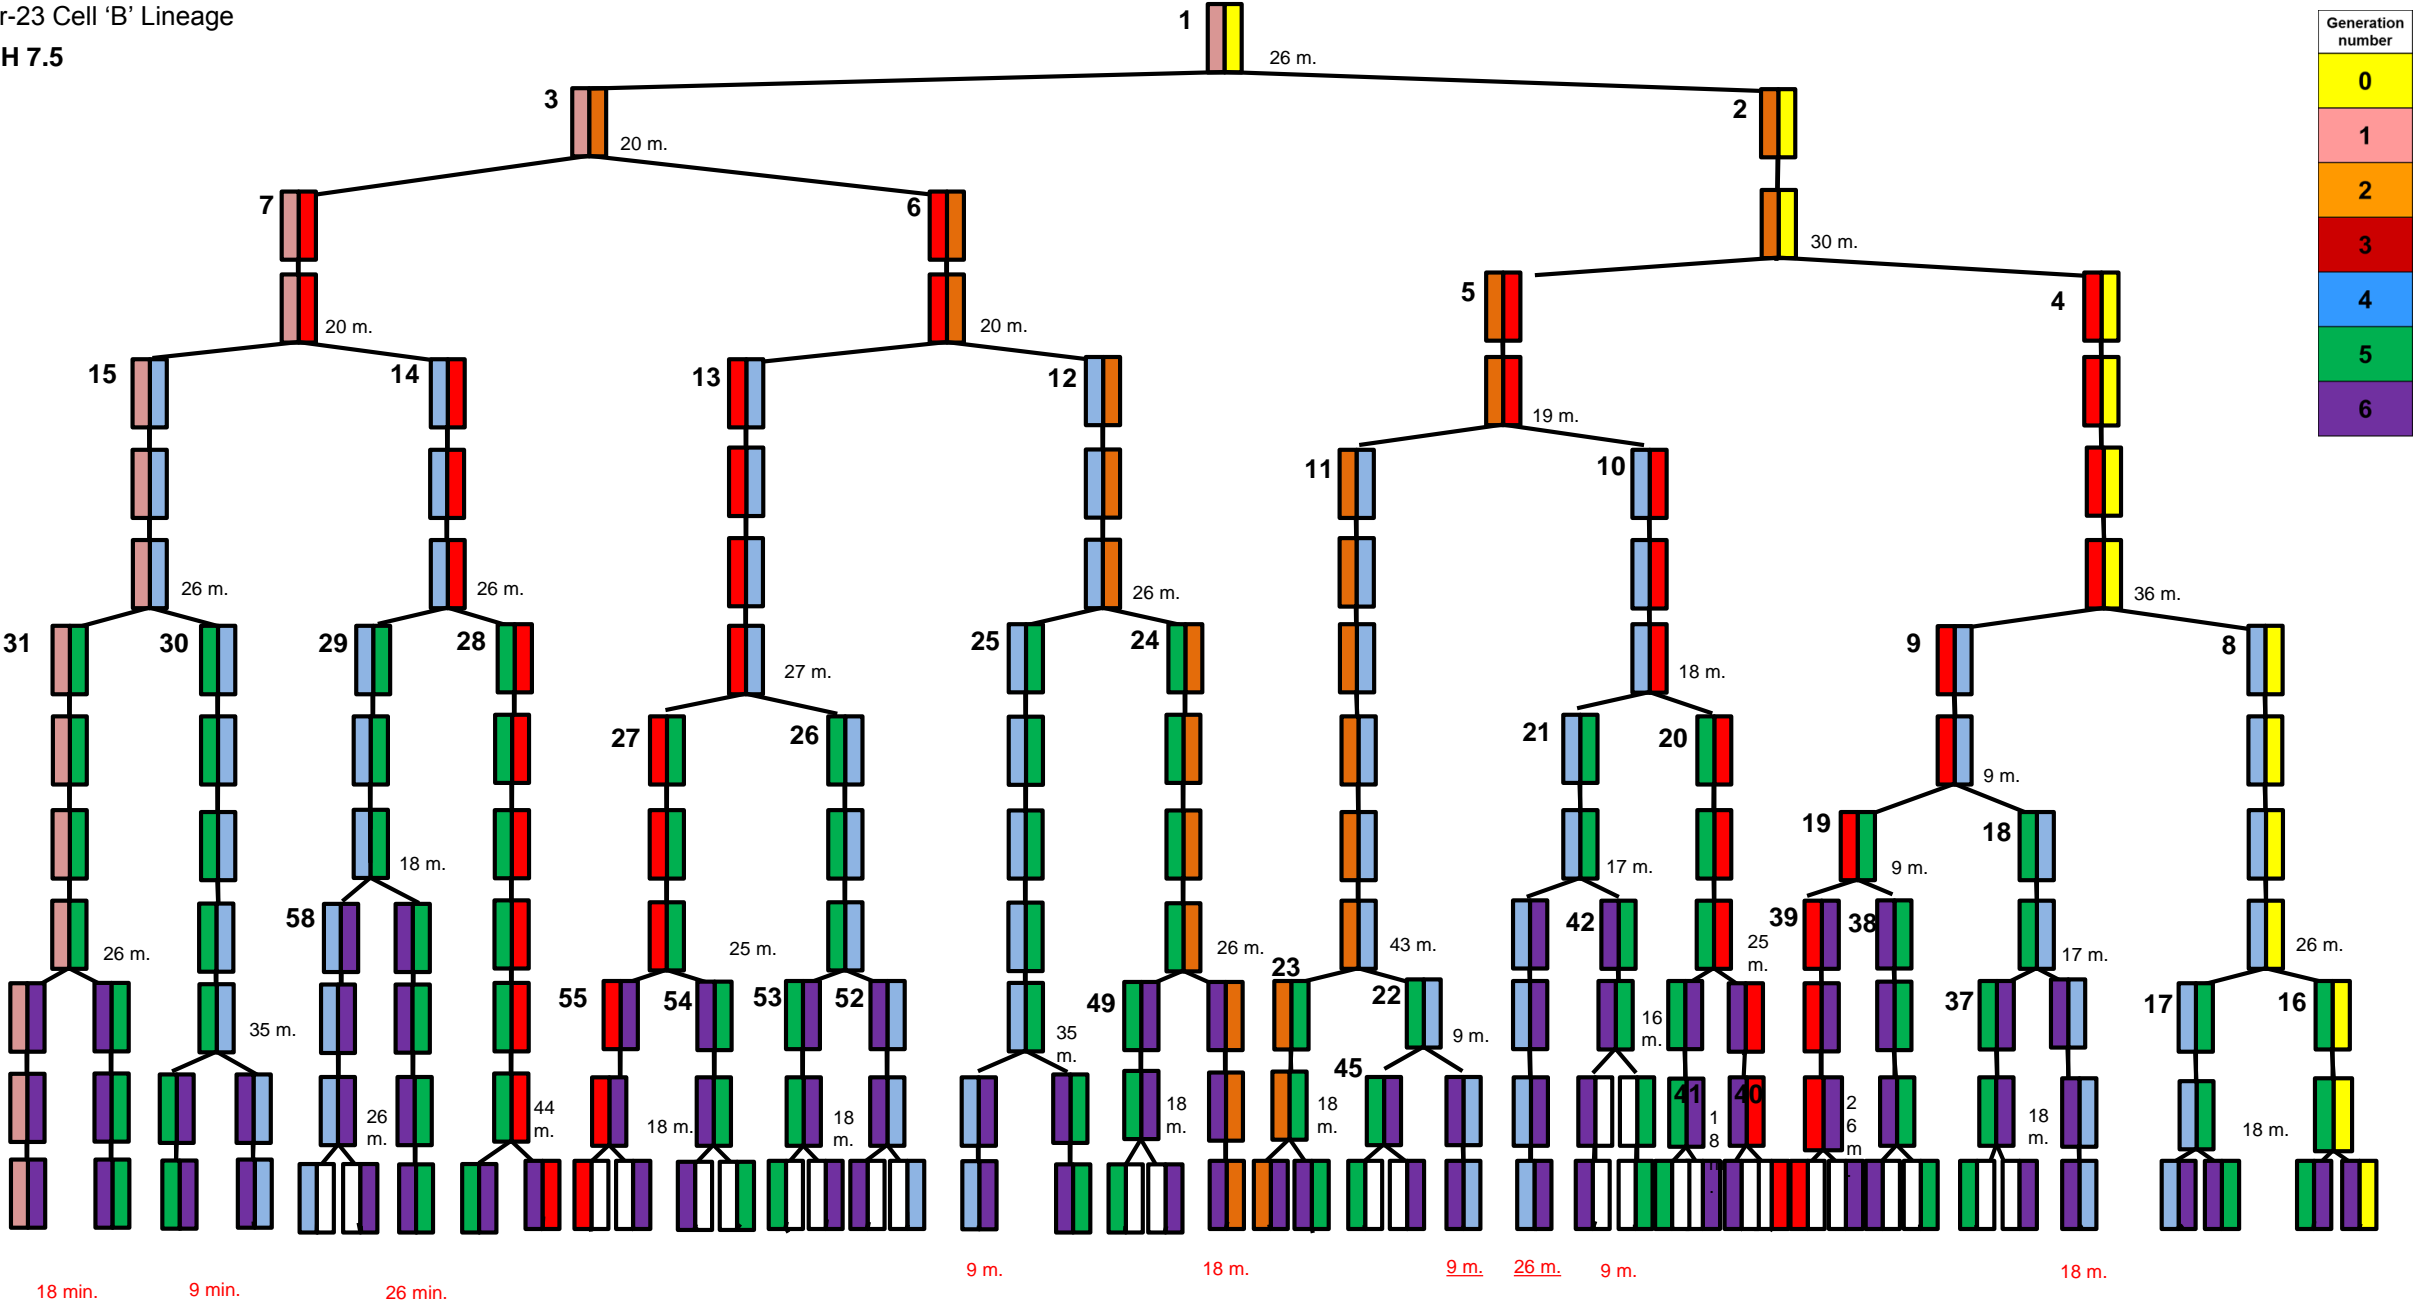

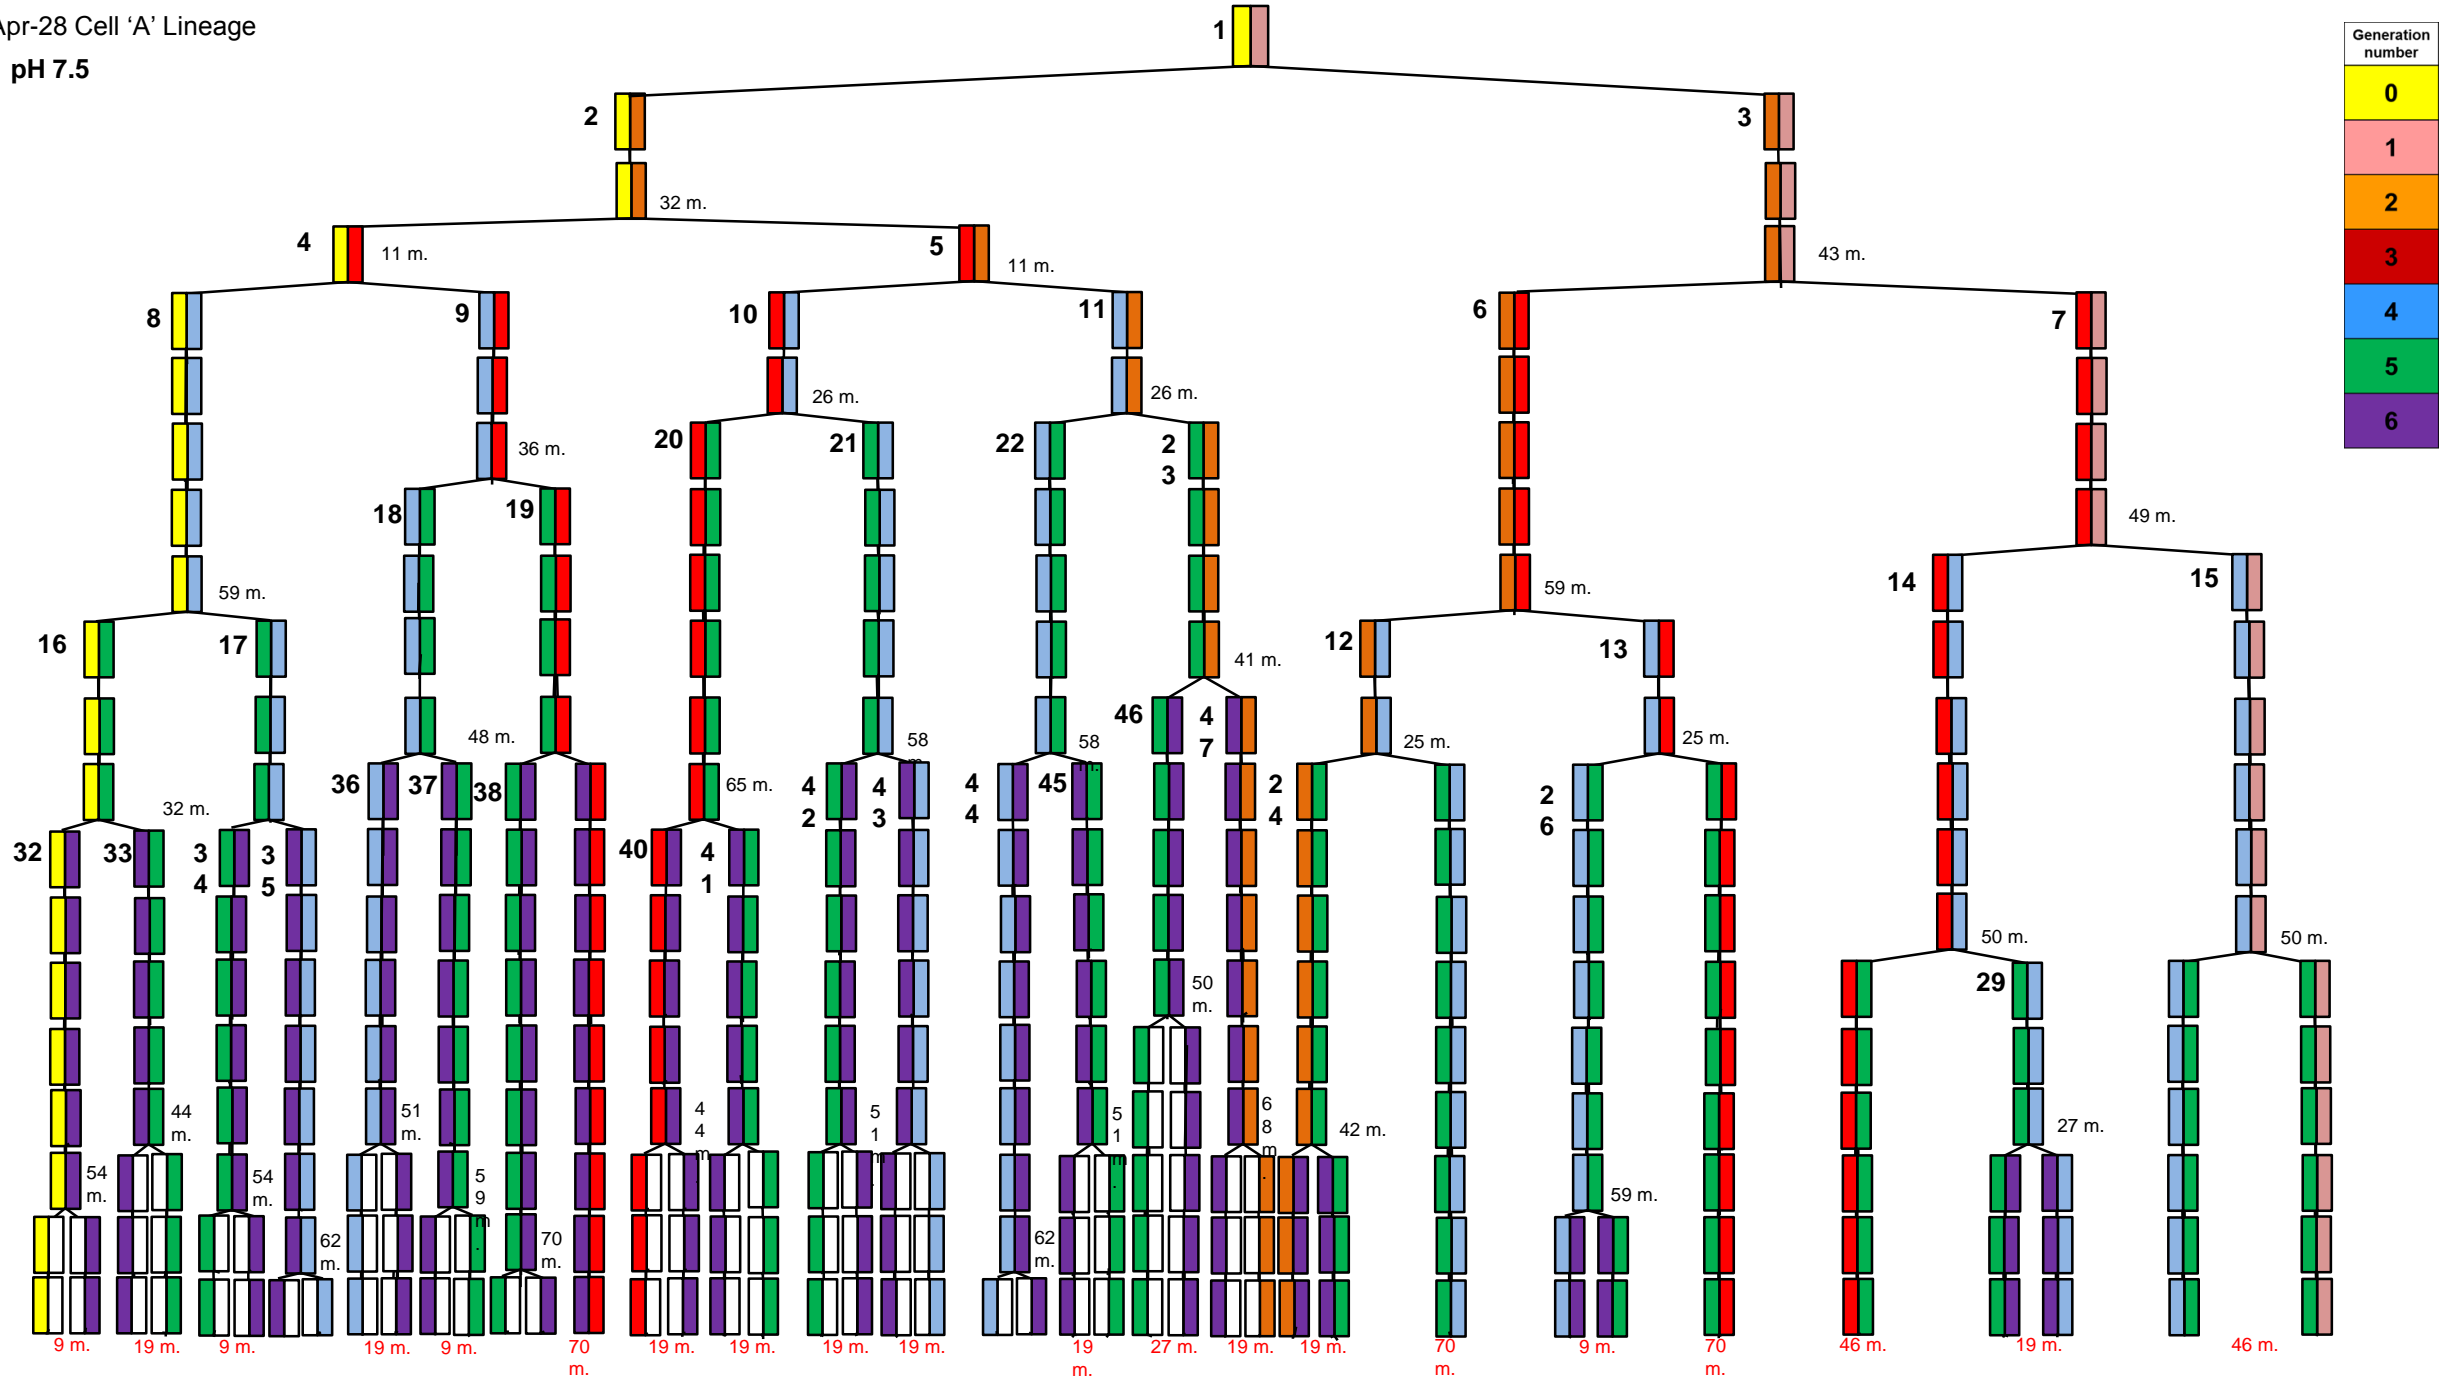

| Generation number |
|-------------------|
| 0                 |
| 1                 |
| 2                 |
| 3                 |
| 4                 |
| 5                 |
| 6                 |

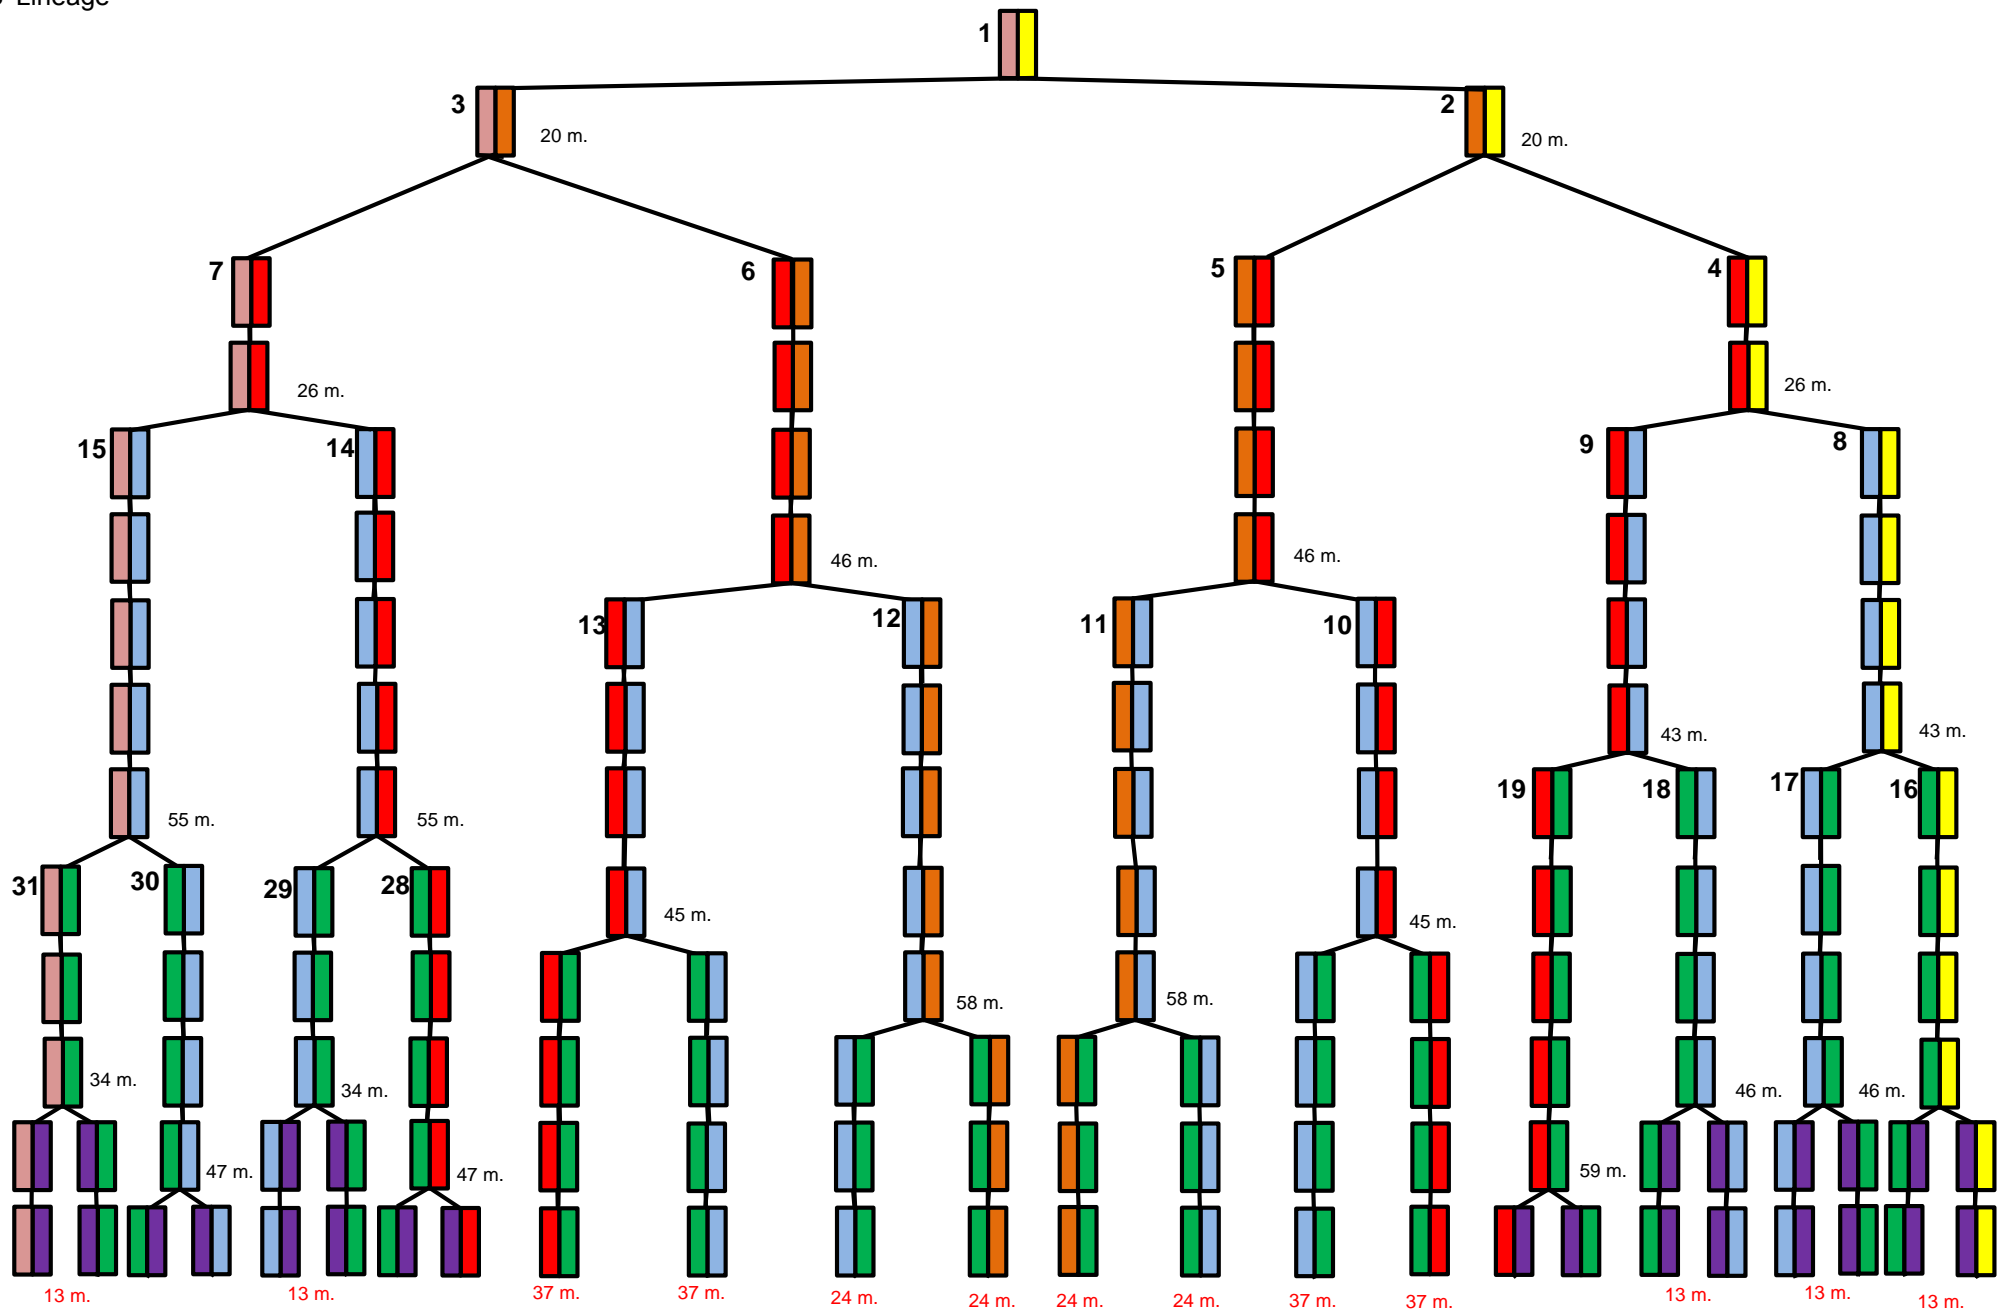

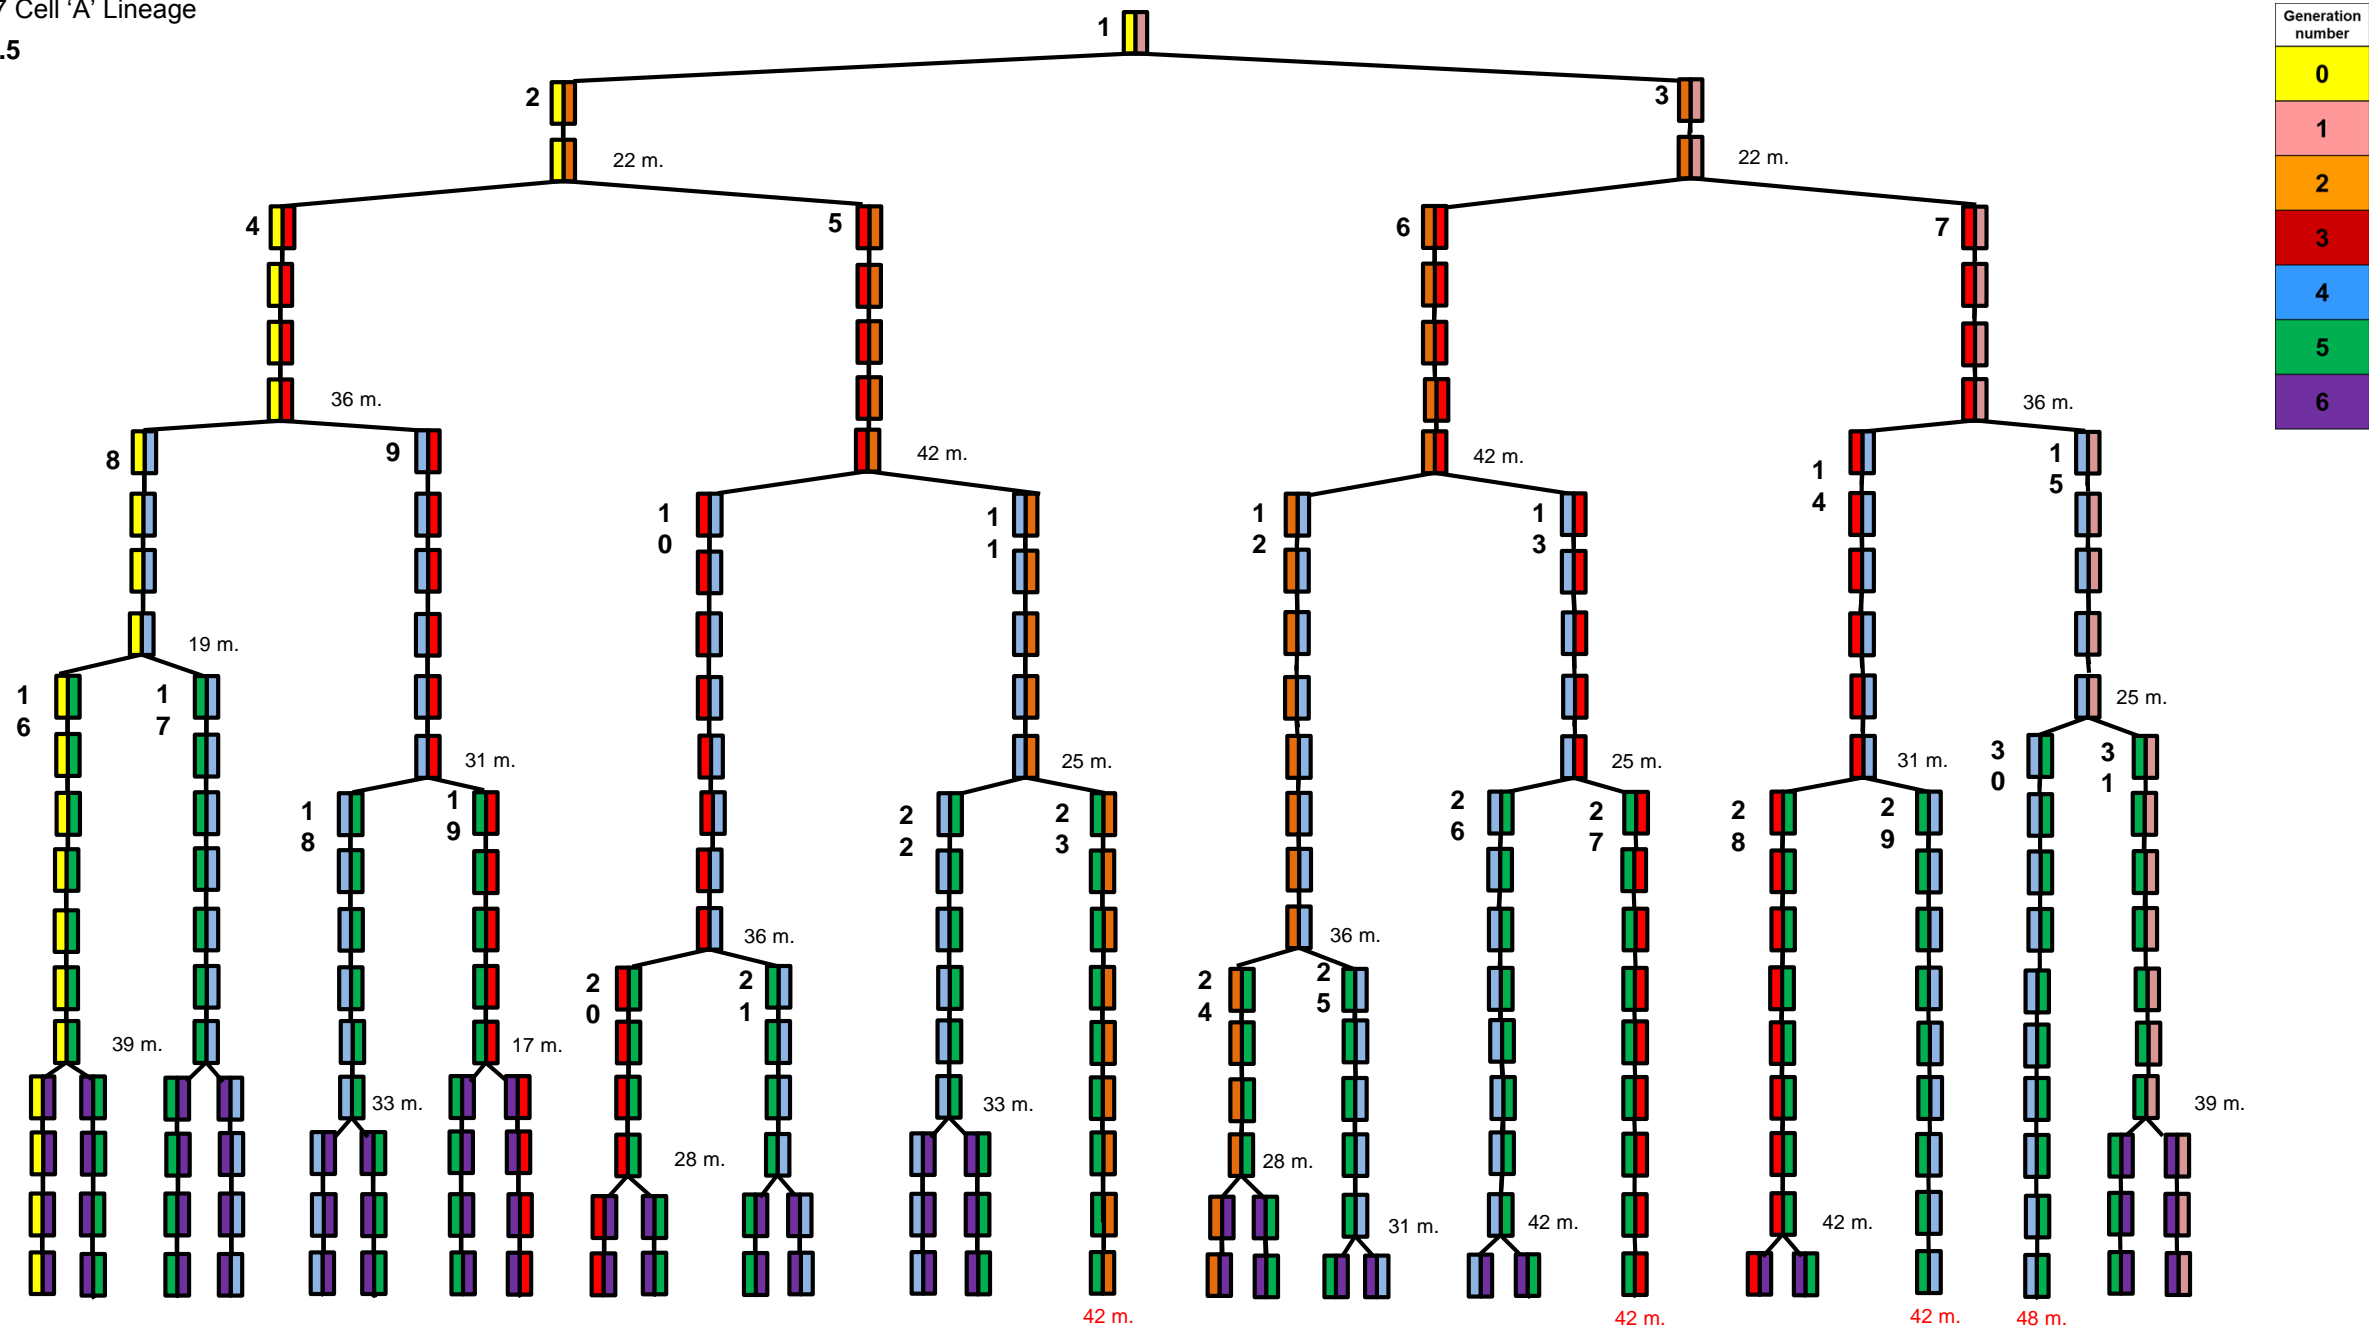

## 2014-July-17 Cell 'B' Lineage

**pH 7.5**

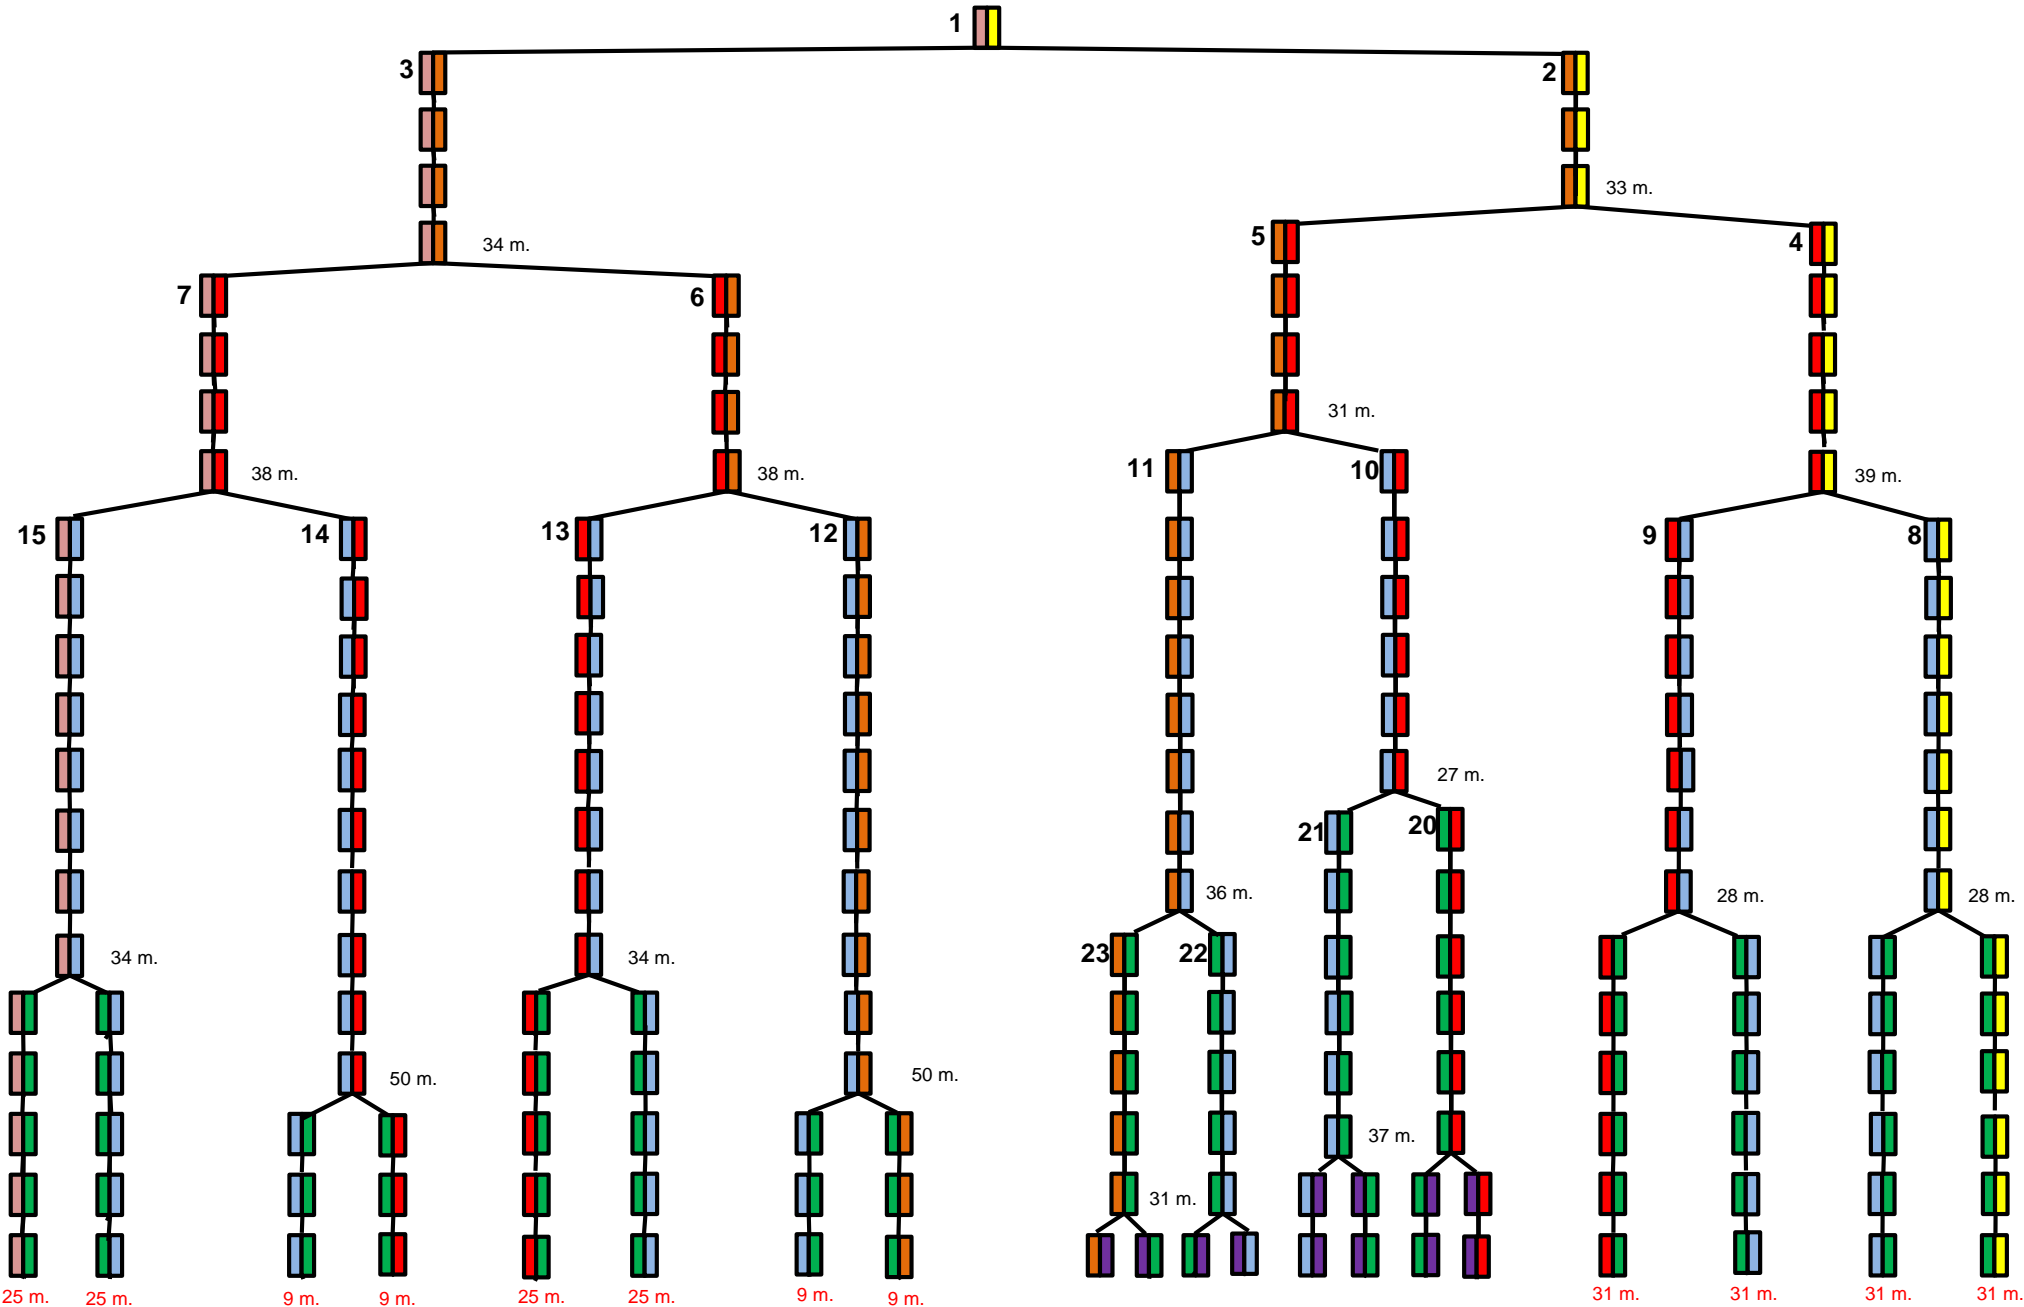

| Generation number |
|-------------------|
| 0                 |
| 1                 |
| 2                 |
| 3                 |
| 4                 |
| 5                 |
| 6                 |

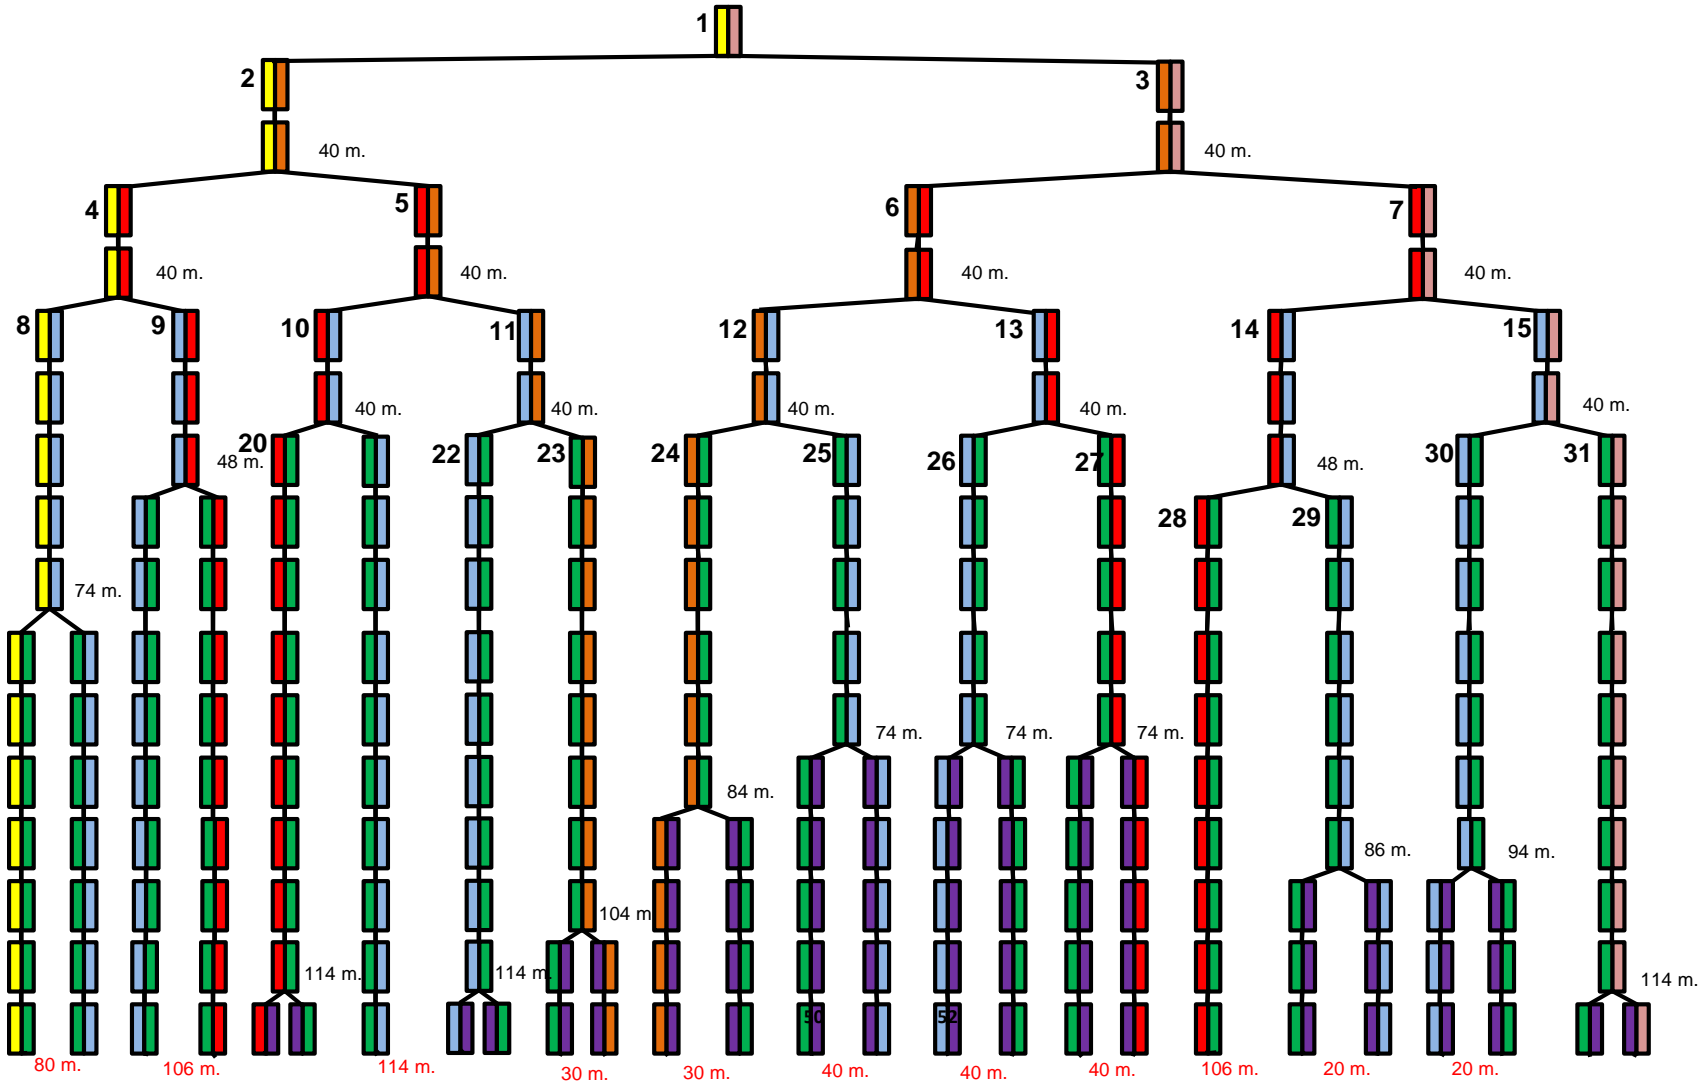

pH 7.5

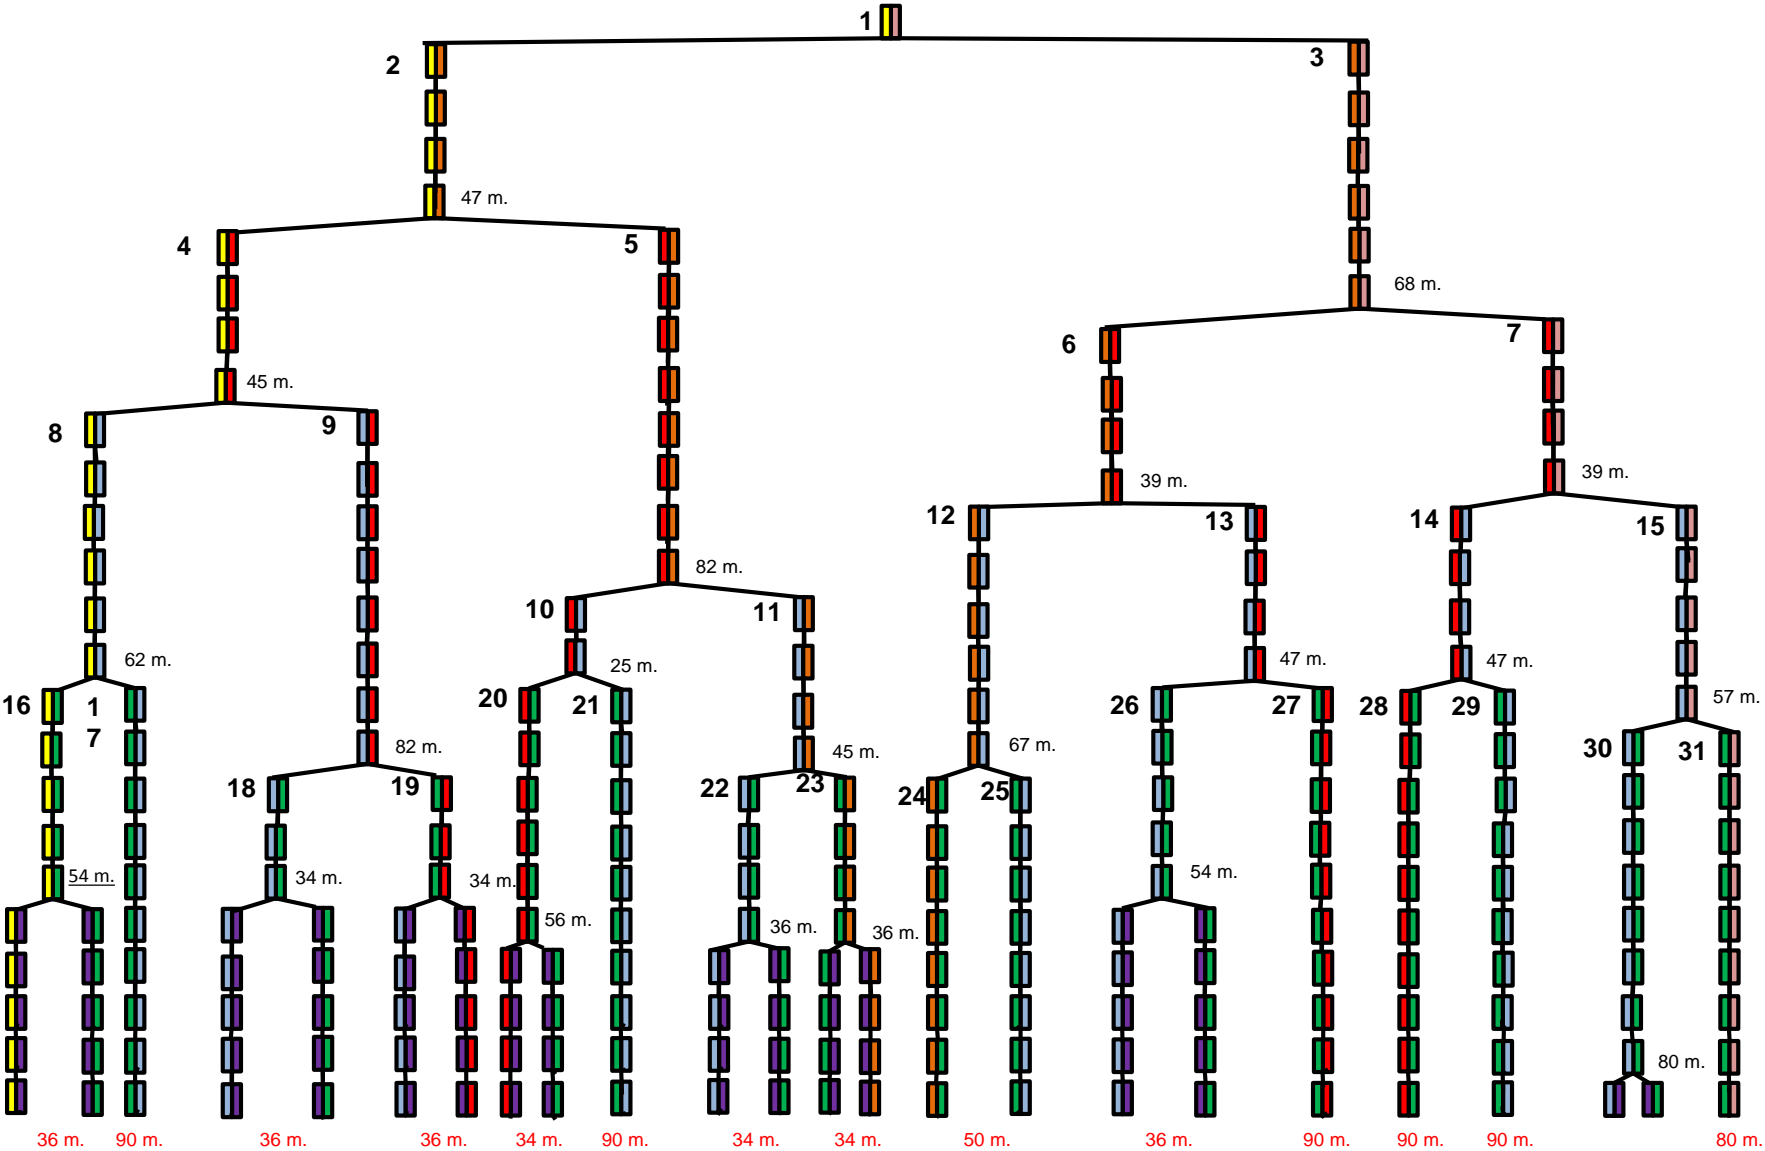

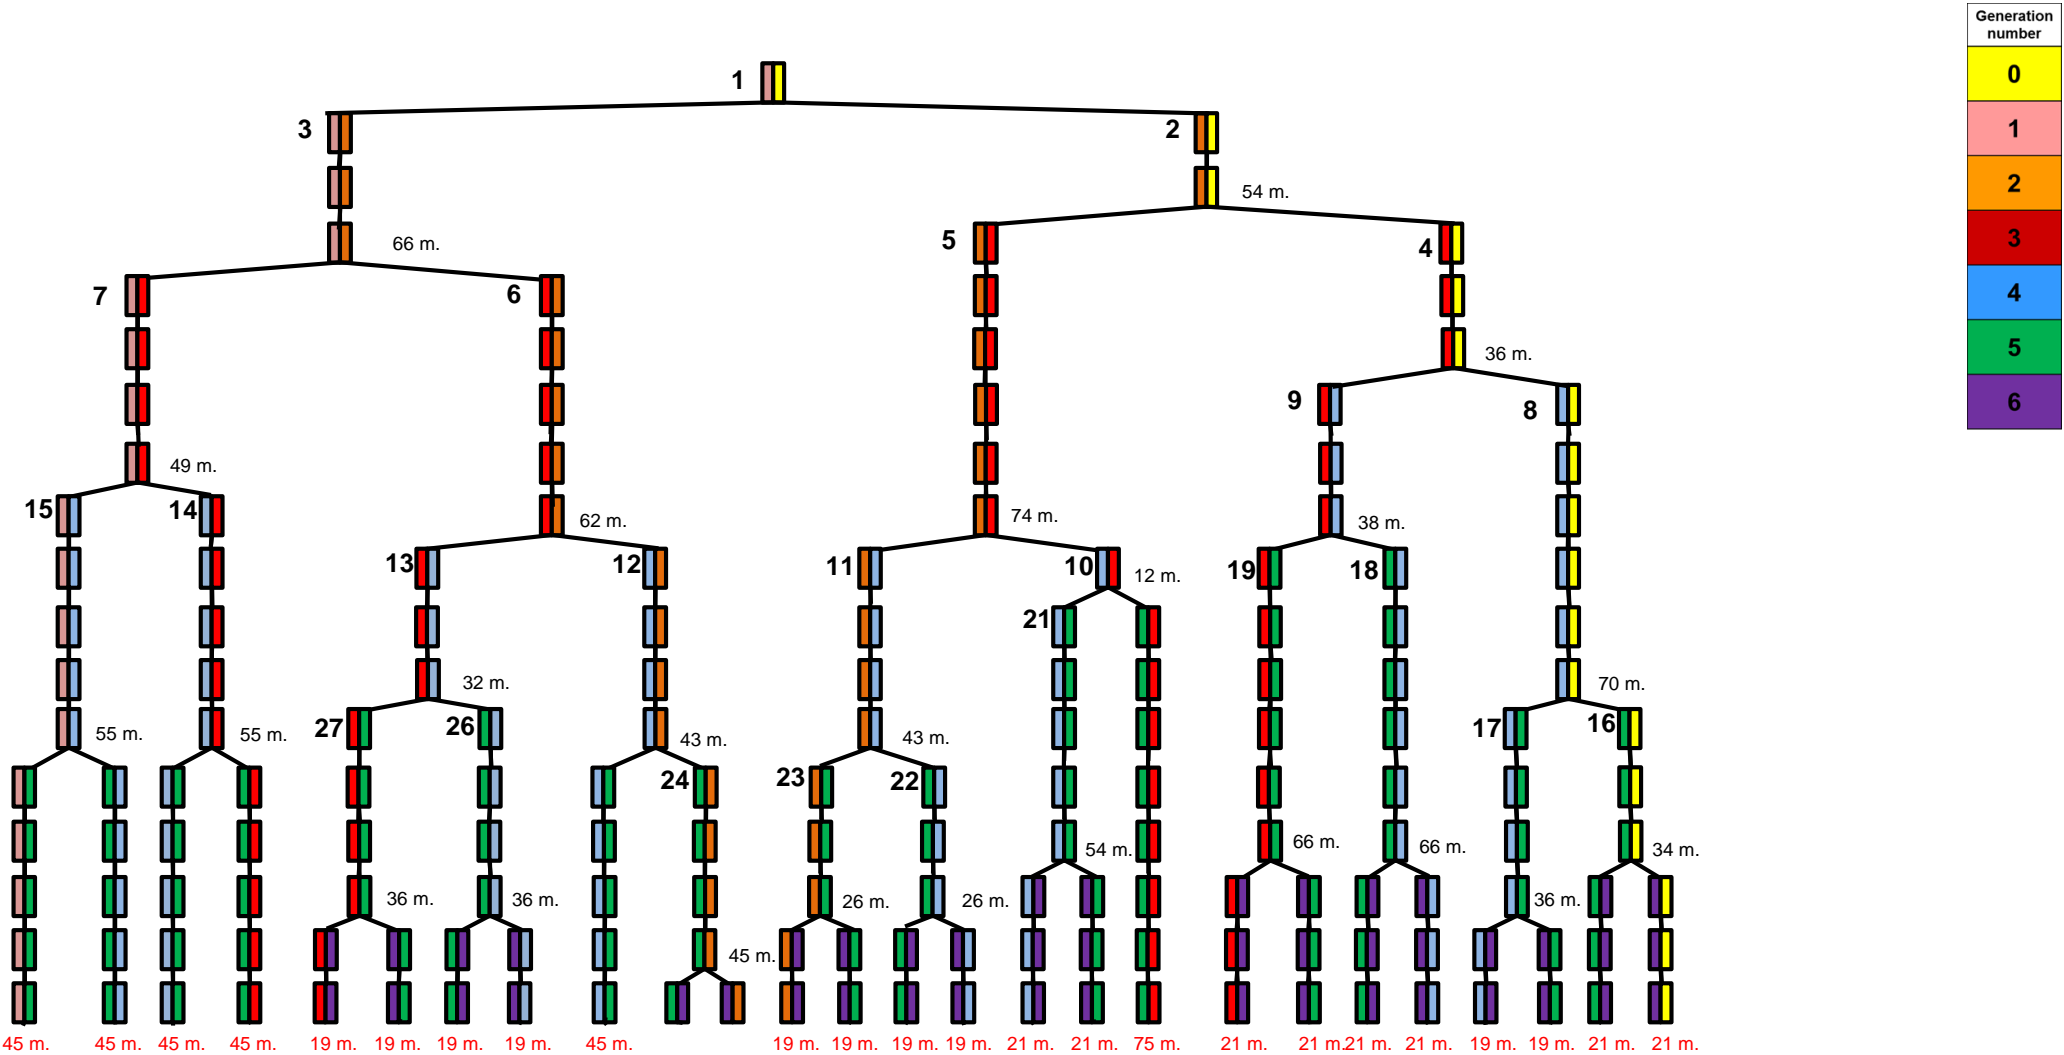

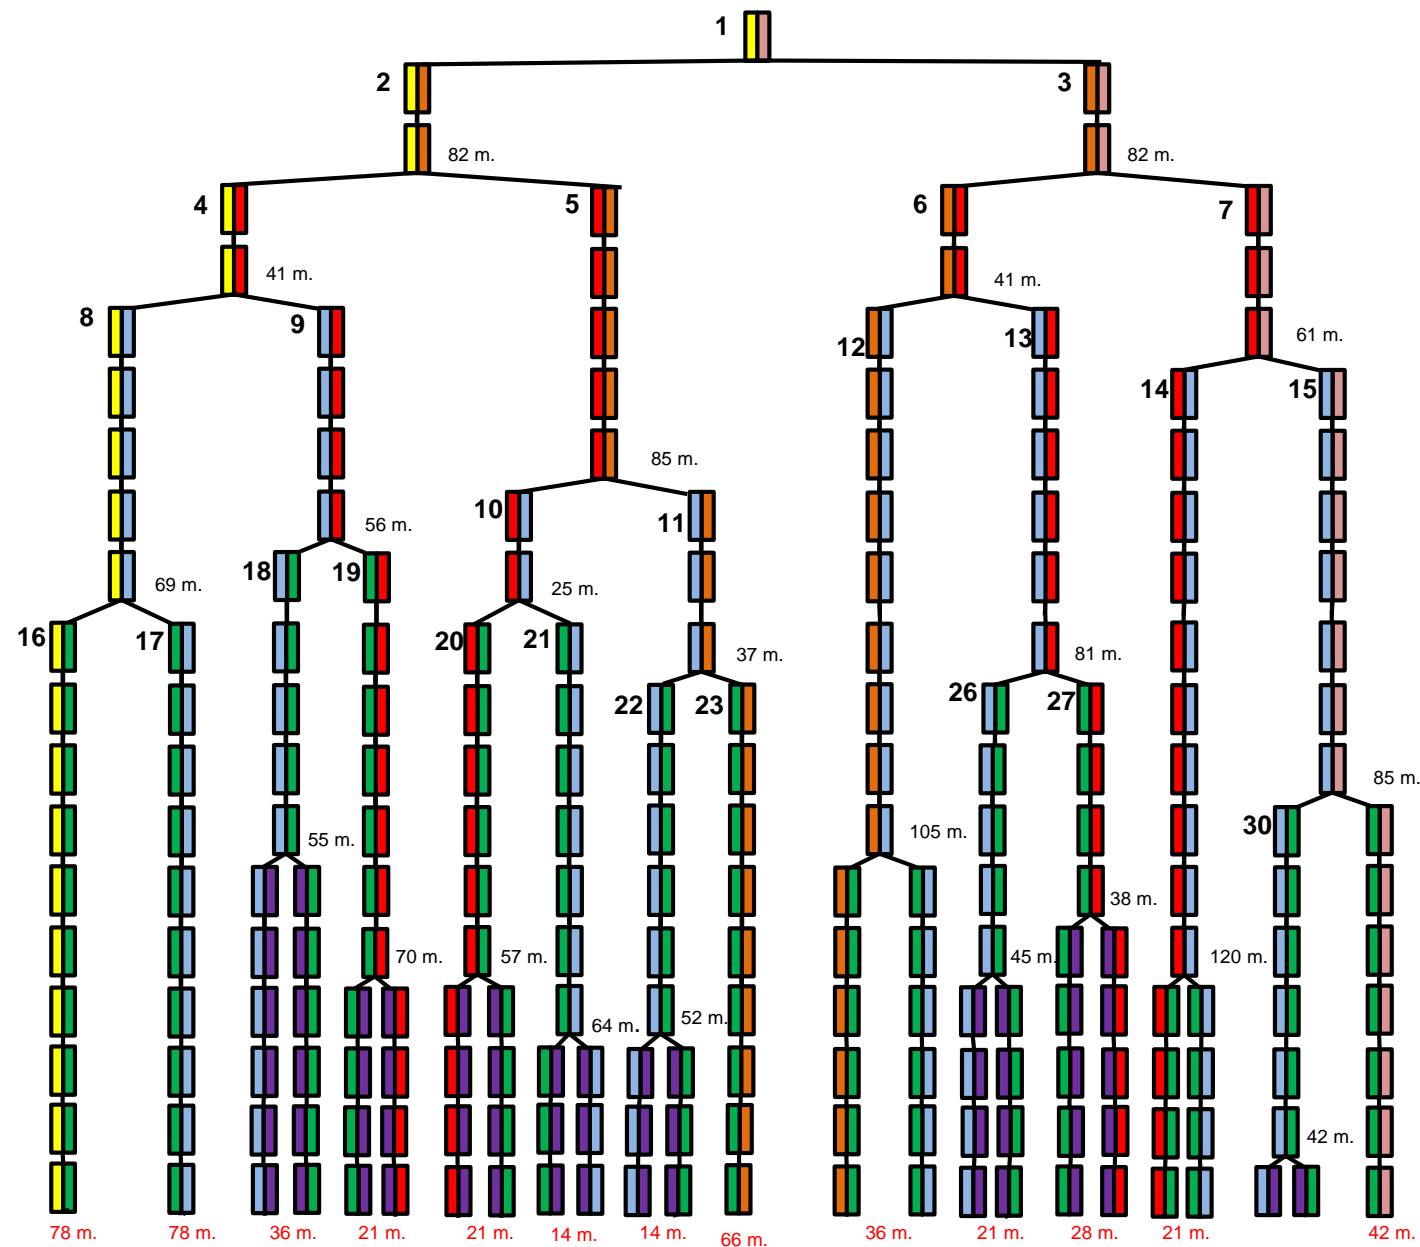

| Generation number |
|-------------------|
| 0                 |
| 1                 |
| 2                 |
| 3                 |
| 4                 |
| 5                 |
| 6                 |

**pH 7.5**

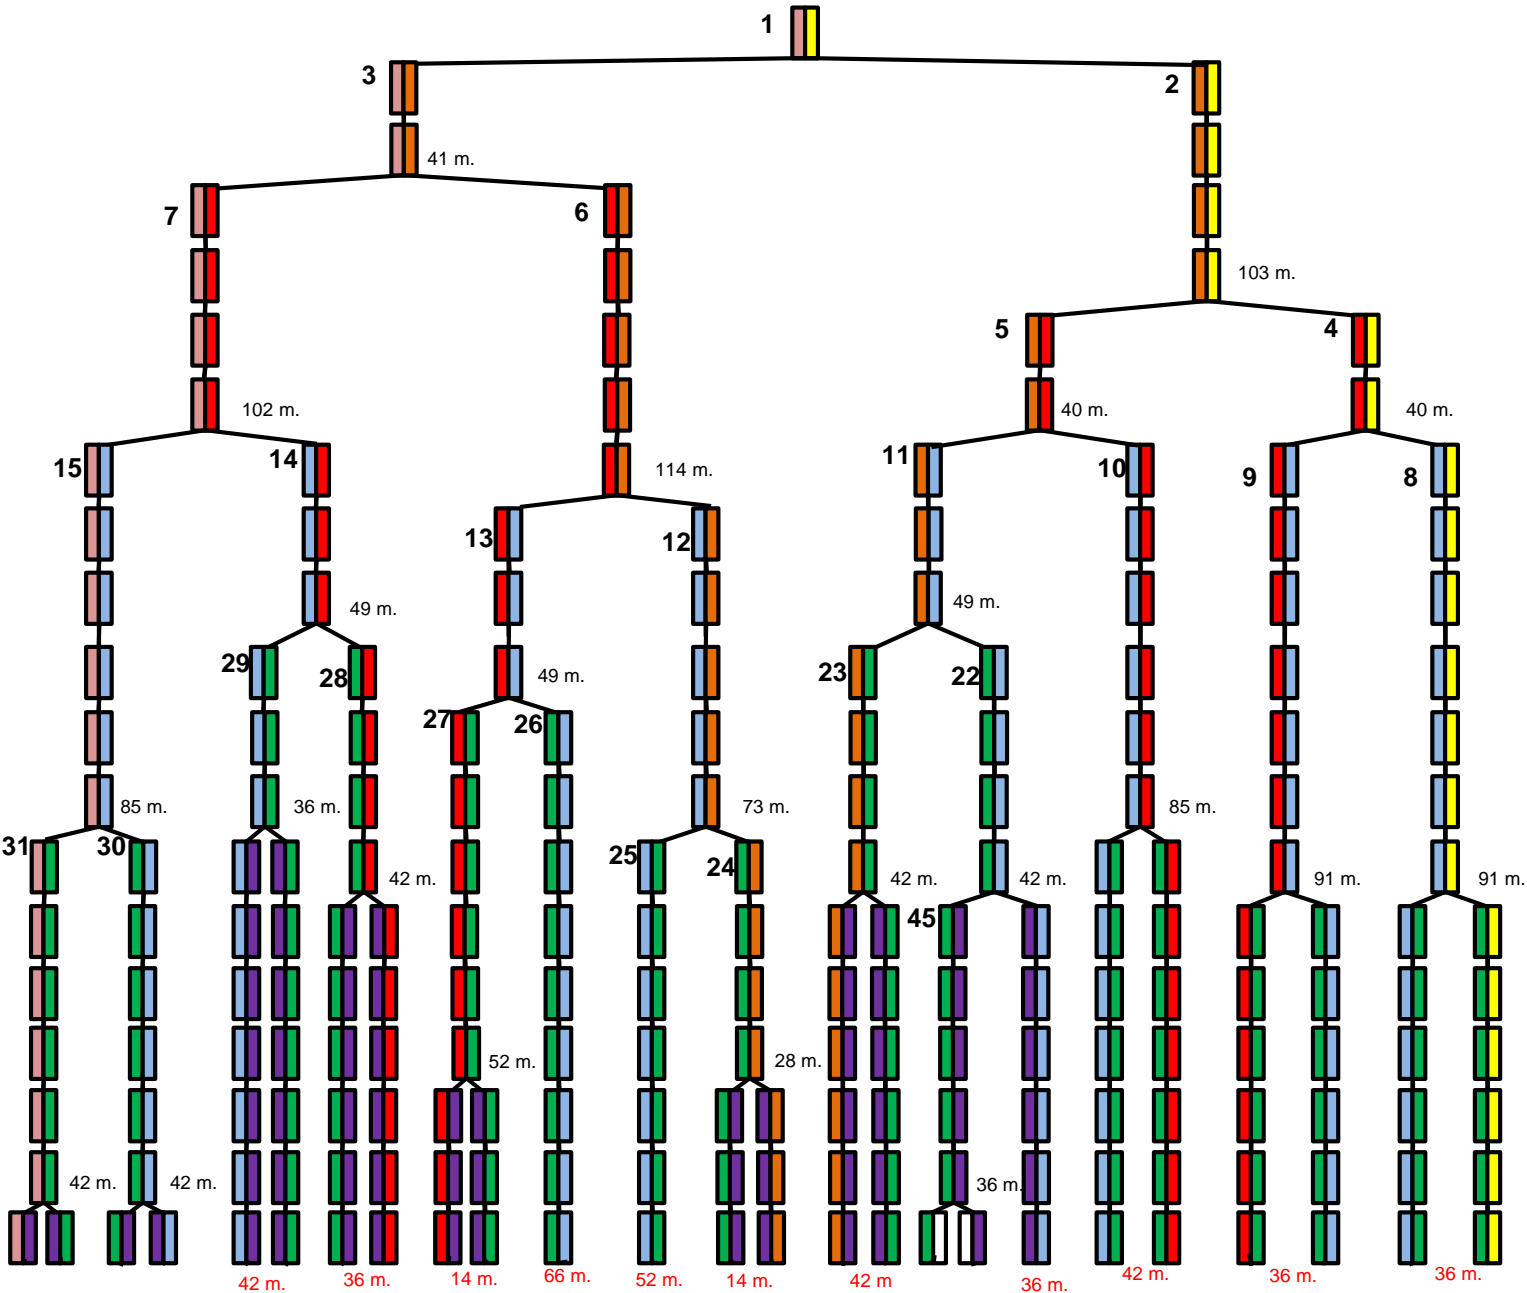

| Generation number |
|-------------------|
| 0                 |
| 1                 |
| 2                 |
| 3                 |
| 4                 |
| 5                 |
| 6                 |
